# Supplementary material for: Multi-omics resources for targeted agronomic improvement of pigmented rice
Source: PubMed Central journal article supplement (PMC10208962; doi:10.1038/s43016-023-00742-9), 2023-05-11
Supplement: 43016_2023_742_MOESM1_ESM.pdf [file 43016_2023_742_MOESM1_ESM.pdf]

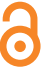

---

# Multi-omics resources for targeted agronomic improvement of pigmented rice

---

In the format provided by the authors and unedited

## **Supplementary Information**

**This file contains:**

### **Supplementary S1**

- Illumina genome resequencing.
- **Supplementary Fig. 1.** Dot plot comparing the genome assemblies of the five varieties and the reference Nipponbare genome.
- **Supplementary Fig. 2.** Genomic landscapes of the 12 chromosomes in the five genome assemblies of pigmented rice.
- **Supplementary Table 1.** Summary of whole-genome sequence assembly, annotation, gene prediction, and structural variants.
- **Supplementary Table 2.** BUSCO assessment of the five genome sequence assemblies.
- **Supplementary Table 3.** Structural variants (SVs) distribution in pigmented rice genome sequences.
- **Supplementary Table 4.** Resequencing of pigmented rice accessions.
- **Supplementary Table 5.** List of pigmented rice accessions and corresponding subpopulations.
- **Supplementary Table 6.** Rice accessions used for phylogenetic analysis.

### **Supplementary S2**

- **Supplementary Fig. 3.** Comparison of the average metabolite abundance among pigmented rice varieties.
- **Supplementary Fig. 4.** Box plots of selected secondary metabolites differing significantly by the grain color variable.
- **Supplementary Fig. 5.** Box plots showing examples of lipid species differentially expressed in the different types of pigmented rice.

### **Supplementary S3**

- **Supplementary Fig. 6.** Metal ion profiling of the pigmented rice.
- Relationship between grain pigments and metal ions.

### **Supplementary S4**

- Embryogenic callus induction and regeneration
- Agrobacterium-mediated transformation.
- Genomic DNA extraction and genotyping.
- Phenotyping of CRISPR/Cas9-targeted Cempo Ireng.

### **Supplementary S5**

- Establishment of a regeneration and transformation system for BR.

### **Supplementary S6**

- Media Setup
- **Supplementary Fig. 7.** Main steps of the establishment of a regeneration protocol for Cempo Ireng.
- **Supplementary Fig. 8.** Different stages of the *Agrobacterium*-mediated transformation of Cempo Ireng.
- **Supplementary Fig. 9.** CRISPR/Cas9-induced knockout of three repressors of heading date in rice.
- **Supplementary Fig. 10.** Protein sequence alignment of the CRISPR mutants and the wild type (Cempo Ireng).
- **Supplementary Table 7.** Genotyping of the T0 and T1 edited plants.
- **Supplementary Table 8.** List of oligos.

### **Supplementary S1**

**Illumina genome resequencing.** The CTAB method was used to extract high-quality genomic DNA from the two-week-old leaves of 46 pigmented rice varieties. The genomic DNA was physically sheared into fragments of 250–1000 bp, after which the libraries were constructed by targeting 350-bp inserts following standard Illumina protocol recommendations. The libraries were prepared by NovaSeq 6000 S1 Reagent Kit v1.5 (Illumina) and sequenced on the Illumina NovaSeq 6000 platform in 2×150-bp paired-end mode. Illumina read adapters from the 46 varieties were masked using Cutadapt v2.3<sup>1</sup>. Trailing low-quality and masked bases were trimmed using Trimmomatic v0.38<sup>2</sup>. Reads shorter than 50 bp after the trimming step were discarded. Synthetic Illumina reads (2×150 bp) were generated from the five varieties sequenced with PacBio CCS using the tool *seqret* included in the EMBOSS package ([www.ebi.ac.uk](http://www.ebi.ac.uk)) and added to the panel of 46 Illumina resequenced varieties.

Reads from the 51 varieties were aligned against the *O. sativa* Nipponbare (IRGSP RefSeq) reference genome using BWA-MEM (v0.7.17)<sup>3</sup>, and then sorted using Samtools v1.8.<sup>4</sup> The aligned reads were filtered using a minimum mapping quality of 30 ( $-10 \log_{10}$  Probability). *FixMateInformation* from the Picard v2.17.16 tool suite (<http://broadinstitute.github.io/picard/>) was used to ensure all mate-pair information was in sync for each read pair. Read duplicates and artifacts were marked using Picard's tool *MarkDuplicates*. An alignment summary, insertion size metrics, and coverage metrics were collected for each sample. *HaplotypeCaller* (GATK v4.2.2.0)<sup>5,6</sup> was used to call variants in the 51 varieties individually, using *GVCF* as the emitting reference confidence mode and setting a minimum base quality score of 30.

*CombineGVCFs* and *GenotypeGVCFs* (GATK v4.2.2.0) were used to perform a joint genotyping of the 51 varieties and an additional subset of 474 *O. sativa* accessions belonging to the 3K-RG project<sup>7</sup>. The 3K-RG accessions were evenly selected from the 15 subpopulations and the admixture subgroup of *O. sativa* identified by Zhou et al.<sup>8</sup>, based on: i) a minimum coverage of 14× and ii) a maximum number of 32 varieties per subpopulation. The 16 Platinum Standard reference genomes<sup>8</sup> were included in the subset. The variant calling for the joint dataset was then filtered to only retain biallelic SNP sites and using the “core SNP set” filtering criterion described by Wang et al.<sup>7</sup>. Vcftools v0.1.17<sup>9</sup> was used to discard any loci showing missing genotypes from the joint genotype dataset. Plink v5.3<sup>10</sup> was used to build a square, symmetric matrix of the IBS distances for all pairs of individuals. Function *prcomp* in R v3.6.0 (<https://CRAN.R-project.org/>) was used to perform the PCA using the distance matrix as input, and the results were plotted using the R package *factoextra* (<https://CRAN.R-project.org/package=factoextra>). The distance matrix was converted into the PHYLIP format (Retief, 2000) and used as an input in DARwin 6.0.21 (<https://darwin.cirad.fr/>) to generate an unweighted NJ phenogram.

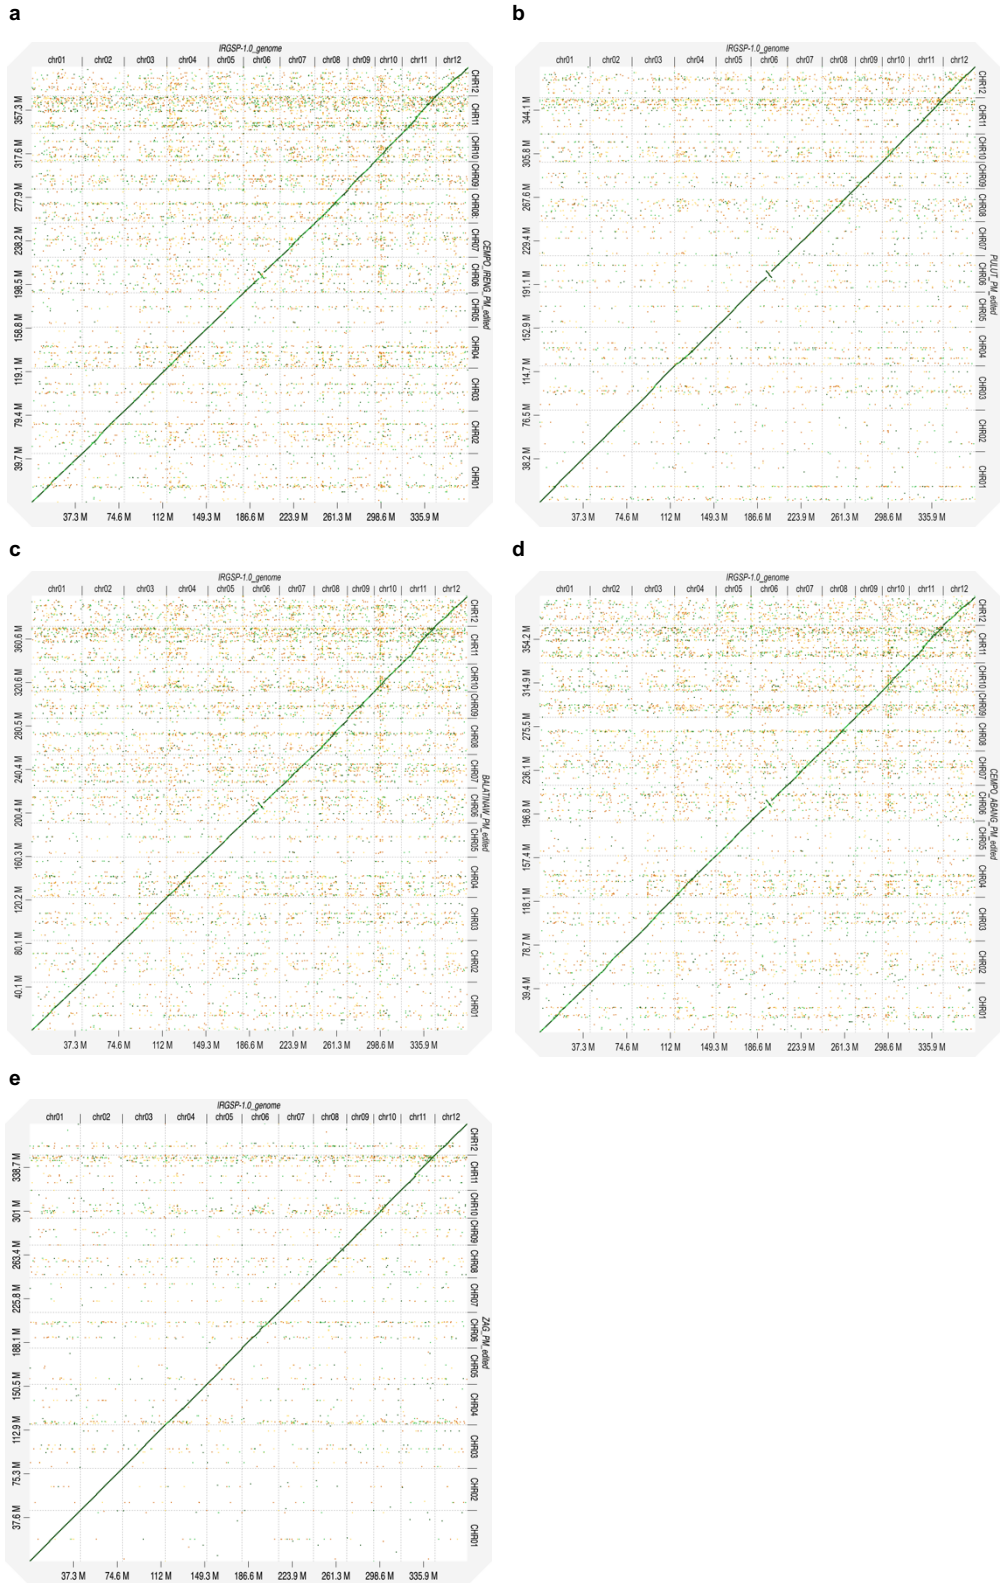

**Supplementary Fig. 1. Dot plot comparing the genome assemblies of the five varieties and the reference Nipponbare genome. a) Cempo Ireng, b), Pulut Hitam-2, c) Balatinaw, d) Cempo Abang, and e) Zag genome assemblies.**

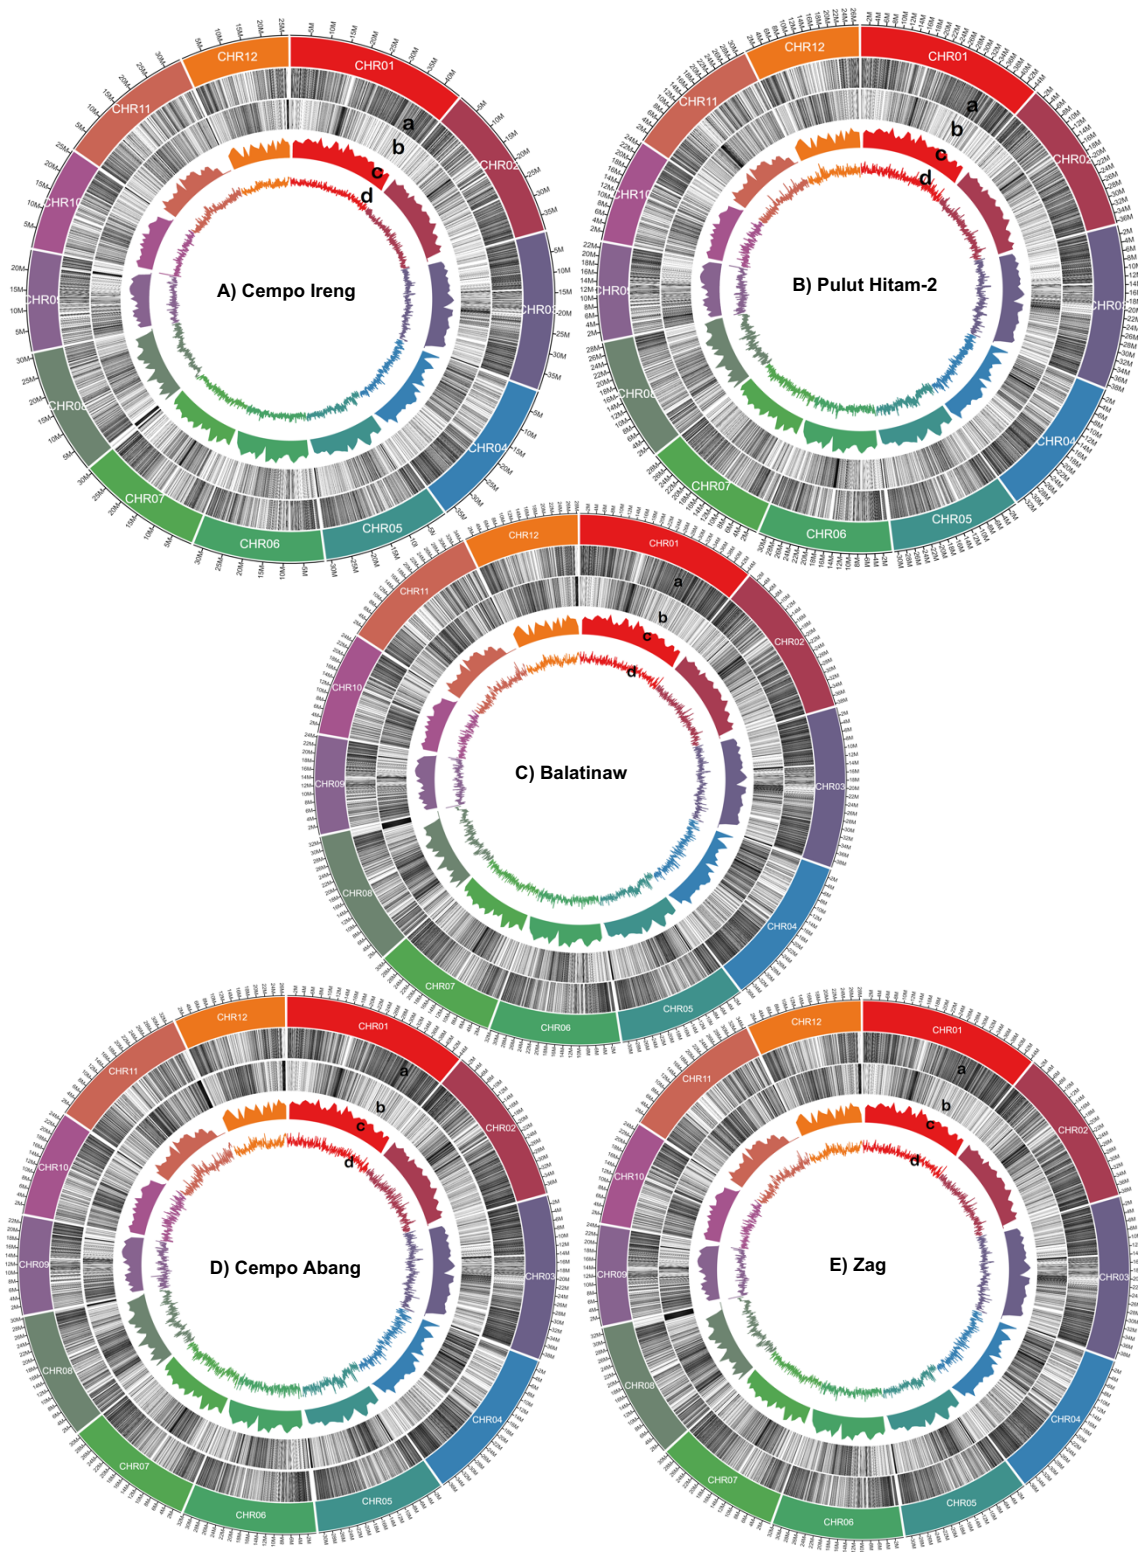

**Supplementary Fig. 2. Genomic landscapes of the 12 chromosomes in the five genome assemblies of pigmented rice.** Characterization of A) Cempo Ireng, B) Pulut Hitam-2, C) Balatinaw, D) Cempo Abang, and E) Zag genomes. Tracks from the outer to the inner circles represent gene density (a), transposable element (TE) density (b), SNP distribution (c), and distribution of GC content (d), respectively.

**Supplementary Table 1. Summary of whole-genome sequence assembly, annotation, gene prediction, and structural variants.**

|                                  | <b>Cempo Ireng</b> | <b>Pulut Hitam-2</b> | <b>Balatinaw</b> | <b>Cempo Abang</b> | <b>Zag</b>     |
|----------------------------------|--------------------|----------------------|------------------|--------------------|----------------|
| <b>No. of CCS reads</b>          | 1,489,510          | 1,633,494            | 1,463,247        | 1,121,911          | 1,591,232      |
| <b>Avg. read length (bp)</b>     | 13,700             | 14,273               | 14,446           | 14,421             | 14,516         |
| <b>Total amount of data (bp)</b> | 20,406,796,938     | 23,315,308,272       | 21,139,214,385   | 16,179,980,203     | 23,098,784,655 |
| <b>Expected coverage</b>         | ~52.3×             | ~59.8×               | ~54.2×           | ~41.5×             | ~59.2×         |
| <b>N50</b>                       | 32,455,524         | 31,787,743           | 33,383,659       | 32,169,044         | 30,678,555     |
| <b>N75</b>                       | 31,037,508         | 28,934,096           | 30,817,566       | 30,344,714         | 28,207,642     |
| <b>Ns / 100 kbp</b>              | 0.18               | 0.24                 | 0.35             | 0.41               | 0.29           |
| <b>Contigs</b>                   | 19                 | 21                   | 26               | 28                 | 23             |
| <b>Genome assembly (Mbp)</b>     | 397.03             | 382.28               | 400.70           | 393.57             | 376.29         |
| <b>GC content (%)</b>            | 43.7               | 43.6                 | 43.7             | 43.7               | 43.5           |
| <b>Repeats percentage (%)</b>    | 49.03%             | 47.21%               | 49.37%           | 48.74%             | 46.4%          |
| <b>Predicted genes</b>           | 38,357             | 38,066               | 38,434           | 38,383             | 38,416         |
| <b>Structural variants (Mbp)</b> | 70.3               | 40.3                 | 73.5             | 71.2               | 21.2           |

**Supplementary Table 2. BUSCO assessment of the five genome sequence assemblies.**

| <b>Accession</b>     | <b>Completeness (%)</b> | <b>Complete with single-copy (%)</b> | <b>Complete with duplicated (%)</b> | <b>Fragmented (%)</b> | <b>Missing (%)</b> |
|----------------------|-------------------------|--------------------------------------|-------------------------------------|-----------------------|--------------------|
| <b>Cempo Ireng</b>   | 98.5                    | 96.3                                 | 2.2                                 | 0.2                   | 1.3                |
| <b>Pulut Hitam-2</b> | 98.5                    | 96.3                                 | 2.2                                 | 0.2                   | 1.3                |
| <b>Balatinaw</b>     | 98.5                    | 96.3                                 | 2.2                                 | 0.2                   | 1.3                |
| <b>Cempo Abang</b>   | 98.4                    | 96.3                                 | 2.1                                 | 0.2                   | 1.4                |
| <b>Zag</b>           | 98.6                    | 96.3                                 | 2.3                                 | 0.2                   | 1.2                |

**Supplementary Table 3. Structural variants (SVs) distribution in pigmented rice genome sequences.** The number and the total size of SVs identified in the five genomes and not shared with Nipponbare.

| Chromosome   | Cempo Ireng   |                      | Pulut Hitam-2 |                      | Balatinaw     |                      | Cempo Abang   |                      | Zag           |                      |
|--------------|---------------|----------------------|---------------|----------------------|---------------|----------------------|---------------|----------------------|---------------|----------------------|
|              | SVs no.       | SVs total size (Mbp) | SVs no.       | SVs total size (Mbp) | SVs no.       | SVs total size (Mbp) | SVs no.       | SVs total size (Mbp) | SVs no.       | SVs total size (Mbp) |
| 1            | 4,198         | 7.9                  | 2,134         | 3.7                  | 4,447         | 8.4                  | 4,351         | 8.4                  | 1,029         | 1.7                  |
| 2            | 3,586         | 6.4                  | 1,201         | 2.3                  | 3,480         | 6.8                  | 3,271         | 6.2                  | 761           | 1.3                  |
| 3            | 2,872         | 4.7                  | 1,410         | 2.2                  | 3,232         | 5.7                  | 3,298         | 5.6                  | 651           | 0.6                  |
| 4            | 2,863         | 5.6                  | 1,730         | 4.2                  | 2,933         | 5.7                  | 3,113         | 6.1                  | 1,379         | 3.2                  |
| 5            | 2,489         | 5.3                  | 1,558         | 3.5                  | 2,440         | 5.2                  | 2,264         | 4.8                  | 794           | 2                    |
| 6            | 3,114         | 7.3                  | 1,217         | 2.7                  | 3,255         | 7.3                  | 3,172         | 7                    | 1,258         | 2.6                  |
| 7            | 3,151         | 5.7                  | 1,382         | 2.7                  | 3,218         | 5.9                  | 2,989         | 5.7                  | 747           | 0.8                  |
| 8            | 2,791         | 6.4                  | 1,875         | 5.7                  | 2,862         | 6.6                  | 2,789         | 6.3                  | 1,180         | 3.1                  |
| 9            | 2,230         | 4.5                  | 1,071         | 3                    | 2,303         | 4.7                  | 2,302         | 4.6                  | 648           | 1.3                  |
| 10           | 2,669         | 5.3                  | 1,821         | 3.6                  | 2,687         | 5.2                  | 2,616         | 5.2                  | 118           | 2.7                  |
| 11           | 3,401         | 6.5                  | 1,604         | 3.1                  | 3,256         | 6.6                  | 3,251         | 6.2                  | 1,349         | 1.3                  |
| 12           | 2,903         | 4.8                  | 1,792         | 3.6                  | 3,063         | 5.4                  | 3,226         | 5.1                  | 775           | 0.6                  |
| <b>Total</b> | <b>36,267</b> | <b>70.3</b>          | <b>18,795</b> | <b>40.3</b>          | <b>37,176</b> | <b>73.5</b>          | <b>36,642</b> | <b>71.2</b>          | <b>10,689</b> | <b>21.2</b>          |



**Supplementary Table 4. Resequencing of pigmented rice accessions.** Summary of the Illumina sequencing statistics. \* denotes the synthetic Illumina reads generated in silico for the PacBio sequenced genome.

| Accession Name | IRGC Code   | Sequencing technology | Raw Data (Gb) | Raw Read Pairs (Million) | Sequencing Coverage | Mapping Coverage (-fold) |
|----------------|-------------|-----------------------|---------------|--------------------------|---------------------|--------------------------|
| Abor-Red-B     | IRGC 10046  | NovaSeq6000           | 7.74          | 47.89                    | 35.91               | 27.32                    |
| Adong-Hitam    | IRGC 60201  | NovaSeq6000           | 7.06          | 43.52                    | 32.64               | 24.36                    |
| Baisbish       | IRGC 5811   | NovaSeq6000           | 6.87          | 42.81                    | 32.10               | 22.55                    |
| Balatinaw*     | IRGC 52968  | synthetic reads       | 4.17          | 40.00                    | 30.00               | 22.53                    |
| Banskopi-Red   | IRGC 67695  | NovaSeq6000           | 6.64          | 41.46                    | 31.10               | 21.15                    |
| Beni-Denia     | IRGC 52627  | NovaSeq6000           | 6.83          | 42.40                    | 31.80               | 22.45                    |
| Beras-Merah24  | NA          | NovaSeq6000           | 6.56          | 40.29                    | 30.22               | 21.66                    |
| Bulu-Hitam     | IRGC 35570  | NovaSeq6000           | 6.23          | 38.58                    | 28.94               | 22.55                    |
| Cempo Abang*   | NA          | synthetic reads       | 4.17          | 40.00                    | 30.00               | 22.72                    |
| Cempo Ireng*   | NA          | synthetic reads       | 4.17          | 40.00                    | 30.00               | 22.68                    |
| Cempo-Merah    | IRGC 35242  | NovaSeq6000           | 7.30          | 44.65                    | 33.49               | 22.67                    |
| Cempo-Turi     | IRGC 35246  | NovaSeq6000           | 7.05          | 43.54                    | 32.66               | 24.38                    |
| Chakhao        | IRGC 51953  | NovaSeq6000           | 7.50          | 46.50                    | 34.88               | 23.03                    |
| DNJ61          | IRGC 8374   | NovaSeq6000           | 6.64          | 41.04                    | 30.78               | 21.79                    |
| DZ78           | IRGC 117610 | NovaSeq6000           | 7.21          | 44.84                    | 33.63               | 23.90                    |
| Heenati        | IRGC 8921   | NovaSeq6000           | 7.28          | 45.29                    | 33.97               | 24.78                    |
| Hilay          | IRGC 47221  | NovaSeq6000           | 7.39          | 45.89                    | 34.42               | 23.19                    |
| Hwang-Mu       | IRGC 1222   | NovaSeq6000           | 7.38          | 45.60                    | 34.20               | 23.62                    |
| Kaivari-Samba  | IRGC 49732  | NovaSeq6000           | 7.23          | 44.79                    | 33.59               | 23.03                    |
| Kalubalawee    | IRGC 15250  | NovaSeq6000           | 5.09          | 31.91                    | 23.93               | 16.77                    |
| Ketan-Adang    | IRGC 93538  | NovaSeq6000           | 6.84          | 42.67                    | 32.00               | 21.59                    |
| Ketan-Hitam    | IRGC 24967  | NovaSeq6000           | 6.73          | 41.31                    | 30.98               | 23.60                    |
| Ketan-Ireng1   | IRGC 35732  | NovaSeq6000           | 7.00          | 43.36                    | 32.52               | 24.55                    |
| Ketan-Ireng2   | IRGC 35733  | NovaSeq6000           | 7.36          | 45.74                    | 34.31               | 25.79                    |
| Ketan-Ireng3   | IRGC 43440  | NovaSeq6000           | 6.49          | 40.58                    | 30.44               | 22.77                    |
| Khao-Gam-Niaw  | IRGC 15016  | NovaSeq6000           | 6.33          | 39.25                    | 29.44               | 22.63                    |
| Khao-Khan-Nwe  | IRGC 126659 | NovaSeq6000           | 2.22          | 13.82                    | 10.37               | 6.90                     |
| Khao-Niaw-Dam  | IRGC 48143  | NovaSeq6000           | 6.38          | 39.90                    | 29.92               | 19.65                    |
| Khoya-Motor    | IRGC 26382  | NovaSeq6000           | 6.64          | 41.25                    | 30.93               | 22.03                    |
| Kum-Kour       | IRGC 57150  | NovaSeq6000           | 7.50          | 45.89                    | 34.42               | 25.79                    |
| Leukat-Hitam   | IRGC 93554  | NovaSeq6000           | 6.75          | 42.37                    | 31.78               | 22.60                    |
| Masuran        | IRGC 11997  | NovaSeq6000           | 6.28          | 38.91                    | 29.18               | 19.45                    |
| Ma-Zhan        | IRGC 60184  | NovaSeq6000           | 6.39          | 39.94                    | 29.95               | 19.87                    |
| Mitak          | IRGC 13592  | NovaSeq6000           | 7.21          | 44.42                    | 33.32               | 25.64                    |
| Nar-B-Upland   | IRGC 1018   | NovaSeq6000           | 6.52          | 40.67                    | 30.50               | 20.73                    |
| Niaw-Dam       | IRGC 48386  | NovaSeq6000           | 6.65          | 80.75                    | 60.56               | 23.44                    |
| Padi-Arang     | IRGC 74639  | NovaSeq6000           | 7.39          | 46.21                    | 34.66               | 23.59                    |
| Parsan         | IRGC 47309  | NovaSeq6000           | 6.56          | 41.14                    | 30.85               | 20.26                    |

|                     |             |                 |      |       |       |       |
|---------------------|-------------|-----------------|------|-------|-------|-------|
| Periavelai-Red-Rice | IRGC 50025  | NovaSeq6000     | 6.60 | 41.40 | 31.05 | 21.27 |
| Perurutong-Nb-A     | IRGC 566    | NovaSeq6000     | 6.11 | 37.71 | 28.28 | 21.97 |
| Pulut-Arang         | IRGC 78905  | NovaSeq6000     | 6.16 | 38.06 | 28.55 | 22.46 |
| Pulut-Hitam1        | IRGC 20083  | NovaSeq6000     | 5.58 | 35.05 | 26.29 | 19.28 |
| Pulut-Hitam2*       | IRGC 110966 | synthetic reads | 4.17 | 40.00 | 30.00 | 23.45 |
| Pulut-Hitam3        | IRGC 36039  | NovaSeq6000     | 6.37 | 40.20 | 30.15 | 20.21 |
| Pulut-Hitam-Siam    | IRGC 54574  | NovaSeq6000     | 6.39 | 39.30 | 29.48 | 22.65 |
| Rayada              | IRGC 77208  | NovaSeq6000     | 6.56 | 40.65 | 30.49 | 21.17 |
| Rebo                | IRGC 13586  | NovaSeq6000     | 7.30 | 45.04 | 33.78 | 25.96 |
| Red42               | IRGC 47309  | NovaSeq6000     | 8.16 | 50.81 | 38.11 | 25.83 |
| Seneman             | IRGC 53169  | NovaSeq6000     | 6.95 | 43.02 | 32.26 | 24.10 |
| Tapol               | IRGC 615    | NovaSeq6000     | 6.07 | 37.58 | 28.19 | 21.50 |
| Zag*                | IRGC 34388  | synthetic reads | 4.17 | 40.00 | 30.00 | 24.56 |

**Supplementary Table 5. List of pigmented rice accessions and corresponding subpopulations.** Table shows accession name, IRGC accession number, color of the grain, country of origin, and assigned subpopulation of 51 whole-genome sequenced accessions (cA1: *circum*-Aus1, cA2: *circum*-Aus2, cB: *circum*-Basmati, GJ-subtrop: *Geng-japonica* subtropical, GJ-temp: *Geng-japonica* temperate, GJ-trop1: *Geng-japonica* tropical1, GJ-trop2: *Geng-japonica* tropical2, XI-1B1: *Xian-indica* 1B1, XI-1B2: *Xian-indica* 1B2, XI-2A: *Xian-indica* 2A, XI-2B: *Xian-indica* 2B, XI-3A: *Xian-indica* 3A, XI-3B1: *Xian-indica* 3B1, XI-3B2: *Xian-indica* 3B2, XI-adm: *Xian-indica* admixed). (\*) Accession sequenced with PacBio CCS from which synthetic Illumina reads were generated.

| Accession Name | IRGC Label  | Grain color | Country of Origin | Subpopulation |
|----------------|-------------|-------------|-------------------|---------------|
| Abor-Red-B     | IRGC 10046  | red         | India             | GJ-subtrop    |
| Adong-Hitam    | IRGC 60201  | black       | Malaysia          | GJ-trop1      |
| Baisbish       | IRGC 5811   | red         | Bangladesh        | cA2           |
| Balatinaw*     | IRGC 52968  | black       | Philippines       | XI-3B2        |
| Banskopi-Red   | IRGC 67695  | red         | India             | cA2           |
| Beni-Denia     | IRGC 52627  | red         | India             | cA2           |
| Beras-Merah24  | NA          | red         | Indonesia         | XI-1B1        |
| Bulu-Hitam     | IRGC 35570  | black       | Philippines       | GJ-trop1      |
| Cempo Abang*   | NA          | red         | Indonesia         | XI-1B1        |
| Cempo Ireng*   | NA          | black       | Indonesia         | XI-adm        |
| Cempo-Merah    | IRGC 35242  | red         | Indonesia         | XI-3A         |
| Cempo-Turi     | IRGC 35246  | red         | Indonesia         | GJ-trop1      |
| Chakhao        | IRGC 51953  | black       | India             | XI-adm        |
| DNJ61          | IRGC 8374   | red         | Bangladesh        | cA1           |
| DZ78           | IRGC 117610 | red         | Bangladesh        | cA1           |
| Heenati        | IRGC 8921   | red         | Sri Lanka         | cA2           |
| Hilay          | IRGC 47221  | red         | Philippines       | XI-3B2        |
| Hwang-Mu       | IRGC 1222   | red         | China             | XI-3B2        |
| Kaivari-Samba  | IRGC 49732  | red         | India             | XI-adm        |
| Kalubalawee    | IRGC 15250  | red         | Sri Lanka         | cA2           |
| Ketan-Adang    | IRGC 93538  | black       | Indonesia         | XI-3A         |
| Ketan-Hitam    | IRGC 24967  | black       | Indonesia         | GJ-trop1      |
| Ketan-Ireng1   | IRGC 35732  | black       | Indonesia         | GJ-trop2      |
| Ketan-Ireng2   | IRGC 35733  | black       | Indonesia         | GJ-trop2      |
| Ketan-Ireng3   | IRGC 43440  | black       | Indonesia         | GJ-trop1      |
| Khao-Gam-Niaw  | IRGC 15016  | black       | Thailand          | GJ-subtrop    |
| Khao-Khan-Nwe  | IRGC 126659 | black       | Thailand          | XI-adm        |
| Khao-Niaw-Dam  | IRGC 48143  | black       | Thailand          | XI-3B1        |
| Khoya-Motor    | IRGC 26382  | red         | Bangladesh        | cB            |
| Kum-Kour       | IRGC 57150  | black       | Thailand          | GJ-subtrop    |
| Leukat-Hitam   | IRGC 93554  | black       | Indonesia         | GJ-trop1      |
| Masuran        | IRGC 11997  | red         | Sri Lanka         | XI-2B         |
| Ma-Zhan        | IRGC 60184  | red         | China             | XI-1A         |
| Mitak          | IRGC 13592  | black       | Indonesia         | GJ-trop1      |
| Nar-B-Upland   | IRGC 1018   | red         | China             | XI-3B2        |
| Niaw-Dam       | IRGC 48386  | black       | Thailand          | GJ-subtrop    |
| Padi-Arang     | IRGC 74639  | black       | Indonesia         | XI-3A         |

|                     |             |       |             |          |
|---------------------|-------------|-------|-------------|----------|
| Parsan              | IRGC 47309  | red   | Philippines | XI-adm   |
| Periavelai-Red-Rice | IRGC 50025  | red   | Sri Lanka   | XI-2B    |
| Perurutong-Nb-A     | IRGC 566    | black | Philippines | GJ-trop1 |
| Pulut-Arang         | IRGC 78905  | black | Malaysia    | GJ-trop1 |
| Pulut-Hitam1        | IRGC 20083  | black | Indonesia   | GJ-trop2 |
| Pulut-Hitam2*       | IRGC 110966 | black | Malaysia    | GJ-trop1 |
| Pulut-Hitam3        | IRGC 36039  | red   | Malaysia    | XI-3A    |
| Pulut-Hitam-Siam    | IRGC 54574  | black | Philippines | GJ-trop1 |
| Rayada              | IRGC 77208  | red   | Bangladesh  | cB       |
| Rebo                | IRGC 13586  | red   | Indonesia   | GJ-trop1 |
| Red42               | IRGC 47309  | red   | Philippines | XI-1B2   |
| Seneman             | IRGC 53169  | red   | Philippines | GJ-trop1 |
| Tapol               | IRGC 615    | black | Philippines | GJ-trop1 |
| Zag*                | IRGC 34388  | red   | India       | GJ-temp  |

---

**Supplementary Table 6. Rice accessions used for phylogenetic analysis.** The table shows accession name, NCBI BioSample number, IRGC accession number, country of origin, and *O. sativa* subpopulation for 474 accessions selected from the 3K-RG as described in Wang, Mauleon, et al. (2018) and in Zhou, Chebotarov, et al. (2020) (cA1: *circum*-Aus1, cA2: *circum*-Aus2, cB: *circum*-Basmati, GJ-subtrop: *Geng-japonica* subtropical, GJ-temp: *Geng-japonica* temperate, GJ-trop1: *Geng-japonica* tropical1, GJ-trop2: *Geng-japonica* tropical2, XI-1B1: *Xian-indica* 1B1, XI-1B2: *Xian-indica* 1B2, XI-2A: *Xian-indica* 2A, XI-2B: *Xian-indica* 2B, XI-3A: *Xian-indica* 3A, XI-3B1: *Xian-indica* 3B1, XI-3B2: *Xian-indica* 3B2, XI-adm: *Xian-indica* admixed).

| Accession Name | NCBI Label | IRGC Label  | Country of Origin        | Subpopulation |
|----------------|------------|-------------|--------------------------|---------------|
| B001           | ERS470219  | IRGC 135900 | China                    | GJ-temp       |
| B004           | ERS470222  | IRGC 136031 | Japan                    | GJ-temp       |
| B006           | ERS470224  | IRGC 136078 | Viet Nam                 | XI-3B2        |
| B007           | ERS470225  | IRGC 136055 | Viet Nam                 | XI-3B2        |
| B012           | ERS470230  | IRGC 135815 | India                    | XI-2B         |
| B015           | ERS470233  | IRGC 135963 | Romania                  | XI-1A         |
| B016           | ERS470234  | IRGC 135829 | Hungary                  | GJ-temp       |
| B018           | ERS470236  | IRGC 135827 | United States of America | GJ-trop1      |
| B021           | ERS470239  | IRGC 136044 | Australia                | XI-3B2        |
| B027           | ERS470244  | IRGC 135858 | Philippines              | XI-3A         |
| B045           | ERS470260  | IRGC 135896 | Japan                    | GJ-temp       |
| B046           | ERS470261  | IRGC 136032 | Japan                    | GJ-temp       |
| B049           | ERS470264  | IRGC 136086 | Nepal                    | cA1           |
| B052           | ERS470266  | IRGC 135949 | Madagascar               | XI-2B         |
| B073           | ERS470287  | NA          | China                    | XI-3B2        |
| B076           | ERS470290  | NA          | China                    | XI-3B2        |
| B095           | ERS470307  | NA          | China                    | XI-3B2        |
| B105           | ERS470315  | NA          | China                    | XI-3B2        |
| B113           | ERS470323  | NA          | China                    | XI-3B2        |
| B131           | ERS470341  | NA          | China                    | XI-3B2        |
| B157           | ERS470367  | NA          | China                    | XI-1A         |
| B160           | ERS470370  | NA          | China                    | GJ-temp       |
| B162           | ERS470372  | NA          | China                    | GJ-temp       |
| B164           | ERS470374  | NA          | China                    | cA1           |
| B182           | ERS470387  | NA          | Japan                    | GJ-temp       |
| B183           | ERS470388  | IRGC 136030 | Japan                    | GJ-temp       |
| B190           | ERS470394  | NA          | Nigeria                  | GJ-trop1      |
| B204           | ERS470408  | NA          | China                    | GJ-temp       |
| B208           | ERS470411  | NA          | China                    | XI-1A         |
| B210           | ERS470412  | NA          | China                    | XI-1A         |
| B212           | ERS470413  | NA          | China                    | GJ-temp       |
| B214           | ERS470415  | NA          | China                    | XI-1B2        |
| B217           | ERS470418  | NA          | China                    | XI-1B2        |
| B232           | ERS470431  | NA          | China                    | XI-1B2        |
| B241           | ERS470439  | NA          | China                    | GJ-subtrop    |
| B243           | ERS470441  | IRGC 135910 | China                    | cA1           |
| B250           | ERS470448  | NA          | China                    | GJ-temp       |
| B261           | ERS470456  | NA          | China                    | XI-1A         |
| B264           | ERS470458  | NA          | China                    | XI-1A         |
| B265           | ERS470459  | NA          | China                    | XI-3B2        |
| B266           | ERS470460  | NA          | China                    | GJ-subtrop    |
| B269           | ERS470463  | IRGC 136083 | Japan                    | GJ-temp       |
| CX10           | ERS470464  | IRGC 135890 | China                    | XI-1A         |
| CX100          | ERS470465  | IRGC 136020 | Nepal                    | XI-1B2        |
| CX101          | ERS470466  | IRGC 135902 | China                    | XI-1A         |
| CX102          | ERS470467  | IRGC 136053 | Taiwan                   | XI-1A         |

|       |           |             |               |          |
|-------|-----------|-------------|---------------|----------|
| CX104 | ERS470469 | IRGC 136037 | Iran          | cB       |
| CX106 | ERS470470 | IRGC 136040 | Viet Nam      | GJ-trop1 |
| CX110 | ERS470475 | IRGC 136062 | Japan         | cB       |
| CX111 | ERS470476 | IRGC 135894 | Egypt         | GJ-trop1 |
| CX125 | ERS470491 | NA          | China         | XI-1B2   |
| CX129 | ERS470494 | IRGC 135986 | Indonesia     | GJ-trop2 |
| CX133 | ERS470499 | NA          | China         | XI-1A    |
| CX134 | ERS470500 | IRGC 135948 | Philippines   | XI-1B2   |
| CX140 | ERS470504 | IRGC 136196 | Japan         | GJ-temp  |
| CX141 | ERS470505 | IRGC 136019 | Indonesia     | XI-3A    |
| CX145 | ERS470509 | NA          | China         | XI-adm   |
| CX149 | ERS470513 | NA          | India         | cB       |
| CX151 | ERS470516 | IRGC 135833 | Philippines   | GJ-trop1 |
| CX160 | ERS470525 | IRGC 136066 | India         | XI-2B    |
| CX220 | ERS470547 | IRGC 135941 | Cote d'Ivoire | GJ-trop1 |
| CX225 | ERS470549 | IRGC 135938 | Philippines   | XI-1B1   |
| CX226 | ERS470550 | IRGC 135916 | Philippines   | XI-1B1   |
| CX230 | ERS470554 | IRGC 135929 | Philippines   | XI-1B1   |
| CX235 | ERS470559 | IRGC 136013 | Philippines   | XI-3A    |
| CX240 | ERS470564 | IRGC 135859 | Brazil        | XI-3A    |
| CX26  | ERS470574 | NA          | Iran          | XI-1B1   |
| CX269 | ERS470581 | IRGC 135911 | Brazil        | GJ-trop1 |
| CX276 | ERS470587 | IRGC 135939 | Philippines   | XI-1B1   |
| CX305 | ERS470607 | IRGC 136090 | China         | XI-1B2   |
| CX317 | ERS470615 | IRGC 135992 | Malaysia      | GJ-temp  |
| CX340 | ERS470624 | IRGC 135907 | China         | XI-1B2   |
| CX344 | ERS470628 | NA          | China         | GJ-temp  |
| CX357 | ERS470642 | IRGC 136023 | Philippines   | XI-1B1   |
| CX358 | ERS470643 | IRGC 136024 | Philippines   | XI-1B1   |
| CX364 | ERS470649 | NA          | NA            | XI-1B1   |
| CX368 | ERS470653 | IRGC 135996 | India         | cA1      |
| CX369 | ERS470654 | IRGC 135947 | Philippines   | XI-1B2   |
| CX381 | ERS470667 | IRGC 135821 | Mali          | XI-1B1   |
| CX383 | ERS470669 | NA          | China         | GJ-temp  |
| CX389 | ERS470675 | IRGC 135960 | China         | GJ-temp  |
| CX403 | ERS470689 | NA          | Philippines   | XI-1B1   |
| CX408 | ERS804445 | NA          | Philippines   | XI-1B2   |
| CX409 | ERS804446 | NA          | Philippines   | XI-1B2   |
| CX410 | ERS804447 | NA          | Philippines   | XI-1B2   |
| CX411 | ERS804448 | NA          | Philippines   | XI-1B2   |
| CX414 | ERS804450 | NA          | Philippines   | XI-1B2   |
| CX416 | ERS804451 | NA          | Philippines   | XI-1B2   |
| CX417 | ERS804452 | NA          | Philippines   | XI-1B2   |
| CX418 | ERS804453 | NA          | Philippines   | XI-1B2   |
| CX419 | ERS804454 | NA          | Philippines   | XI-1B2   |
| CX420 | ERS804455 | NA          | Philippines   | XI-1B2   |
| CX421 | ERS804456 | NA          | Philippines   | XI-1B2   |
| CX423 | ERS804458 | NA          | Philippines   | XI-1B2   |
| CX424 | ERS804459 | NA          | Philippines   | XI-1B2   |
| CX54  | ERS470705 | NA          | China         | XI-3B2   |
| CX561 | ERS804465 | NA          | China         | XI-1B1   |
| CX578 | ERS804466 | NA          | Philippines   | GJ-temp  |
| CX59  | ERS470712 | IRGC 135983 | Philippines   | cB       |
| CX60  | ERS470714 | IRGC 135837 | India         | XI-1B1   |
| CX65  | ERS470718 | IRGC 135884 | Iran          | cB       |
| CX66  | ERS470719 | IRGC 136052 | Iran          | cB       |
| CX72  | ERS470725 | IRGC 135838 | Pakistan      | cB       |

|                |           |             |                                  |            |
|----------------|-----------|-------------|----------------------------------|------------|
| CX76           | ERS470729 | IRGC 135841 | Sri Lanka                        | XI-1B1     |
| CX83           | ERS470736 | IRGC 136074 | Viet Nam                         | XI-1B1     |
| CX90           | ERS470744 | IRGC 135863 | Nepal                            | XI-1B2     |
| CX92           | ERS470746 | IRGC 136063 | India                            | XI-1B2     |
| CX97           | ERS470750 | IRGC 135851 | India                            | XI-adm     |
| CX98           | ERS470751 | IRGC 135882 | India                            | XI-2B      |
| CX99           | ERS470752 | IRGC 135883 | India                            | XI-2B      |
| IRIS 313-10020 | ERS467790 | IRGC 120968 | Sri Lanka                        | cA2        |
| IRIS 313-10026 | ERS468144 | IRGC 125804 | Madagascar                       | XI-2B      |
| IRIS 313-10097 | ERS468361 | IRGC 125830 | Republic of Korea                | GJ-temp    |
| IRIS 313-10109 | ERS468229 | IRGC 125735 | Nigeria                          | XI-3A      |
| IRIS 313-10114 | ERS468156 | IRGC 125739 | Burundi                          | XI-2B      |
| IRIS 313-10150 | ERS467826 | IRGC 126249 | India                            | cA1        |
| IRIS 313-10171 | ERS468167 | IRGC 125944 | China                            | XI-1A      |
| IRIS 313-10177 | ERS468168 | IRGC 125719 | China                            | XI-3B2     |
| IRIS 313-10179 | ERS468170 | IRGC 125755 | China                            | XI-3B2     |
| IRIS 313-10221 | ERS468176 | IRGC 125663 | China                            | XI-3B2     |
| IRIS 313-10234 | ERS468178 | IRGC 125873 | Philippines                      | XI-1B1     |
| IRIS 313-10237 | ERS468180 | NA          | Philippines                      | XI-1B1     |
| IRIS 313-10239 | ERS468182 | IRGC 125827 | China                            | XI-3B2     |
| IRIS 313-10392 | ERS468305 | IRGC 127075 | Philippines                      | XI-1B1     |
| IRIS 313-10477 | ERS469372 | IRGC 128454 | China                            | XI-3B2     |
| IRIS 313-10534 | ERS469396 | IRGC 127290 | India                            | cA2        |
| IRIS 313-10544 | ERS469404 | IRGC 127340 | India                            | XI-2B      |
| IRIS 313-10576 | ERS469434 | IRGC 127979 | Sierra Leone                     | XI-2A      |
| IRIS 313-10577 | ERS469435 | IRGC 128318 | Philippines                      | GJ-trop1   |
| IRIS 313-10582 | ERS469440 | IRGC 128440 | Philippines                      | GJ-trop1   |
| IRIS 313-10603 | ERS469453 | IRGC 127871 | Bangladesh                       | cA2        |
| IRIS 313-10605 | ERS469455 | IRGC 127348 | Bangladesh                       | cA2        |
| IRIS 313-10614 | ERS469460 | IRGC 128049 | Hong Kong                        | XI-3B2     |
| IRIS 313-10623 | ERS469461 | IRGC 127804 | Nepal                            | cA2        |
| IRIS 313-10642 | ERS469465 | IRGC 128455 | Japan                            | GJ-temp    |
| IRIS 313-10649 | ERS469469 | IRGC 127758 | Philippines                      | GJ-trop2   |
| IRIS 313-10657 | ERS469478 | IRGC 135801 | Lao People's Democratic Republic | GJ-subtrop |
| IRIS 313-10664 | ERS469484 | IRGC 127163 | India                            | XI-2A      |
| IRIS 313-10687 | ERS469504 | NA          | Malaysia                         | XI-3A      |
| IRIS 313-10693 | ERS469509 | IRGC 132268 | Indonesia                        | GJ-trop2   |
| IRIS 313-10706 | ERS469521 | NA          | Malaysia                         | XI-3A      |
| IRIS 313-10718 | ERS469524 | IRGC 128073 | Sri Lanka                        | cA2        |
| IRIS 313-10744 | ERS469552 | IRGC 127811 | Indonesia                        | GJ-trop2   |
| IRIS 313-10748 | ERS469557 | IRGC 127578 | Viet Nam                         | XI-3B2     |
| IRIS 313-10762 | ERS469572 | IRGC 127207 | Indonesia                        | XI-3A      |
| IRIS 313-10778 | ERS469586 | NA          | Indonesia                        | XI-3A      |
| IRIS 313-10789 | ERS469598 | IRGC 132009 | Indonesia                        | GJ-trop2   |
| IRIS 313-10790 | ERS469599 | NA          | Indonesia                        | GJ-trop2   |
| IRIS 313-10793 | ERS469602 | IRGC 132257 | Indonesia                        | GJ-trop1   |
| IRIS 313-10802 | ERS469622 | NA          | Indonesia                        | GJ-trop2   |
| IRIS 313-10805 | ERS469652 | IRGC 127746 | Indonesia                        | GJ-trop2   |
| IRIS 313-10813 | ERS469615 | NA          | Indonesia                        | XI-3A      |
| IRIS 313-10814 | ERS469616 | IRGC 128163 | Indonesia                        | XI-3A      |
| IRIS 313-10816 | ERS469618 | IRGC 128164 | Indonesia                        | GJ-trop2   |
| IRIS 313-10817 | ERS469619 | IRGC 135796 | Indonesia                        | GJ-trop2   |
| IRIS 313-10824 | ERS469627 | IRGC 128053 | Indonesia                        | XI-3A      |
| IRIS 313-10834 | ERS469637 | IRGC 128314 | India                            | GJ-subtrop |
| IRIS 313-10841 | ERS469645 | IRGC 128077 | Indonesia                        | GJ-trop2   |
| IRIS 313-10845 | ERS469648 | IRGC 132418 | India                            | cA2        |
| IRIS 313-10847 | ERS469649 | IRGC 127972 | India                            | XI-2A      |

|                |           |             |                                  |            |
|----------------|-----------|-------------|----------------------------------|------------|
| IRIS 313-10851 | ERS469654 | IRGC 132387 | India                            | cB         |
| IRIS 313-10852 | ERS469655 | IRGC 127169 | India                            | cA1        |
| IRIS 313-10858 | ERS469661 | IRGC 127131 | India                            | XI-adm     |
| IRIS 313-10861 | ERS469664 | IRGC 127134 | India                            | cA1        |
| IRIS 313-10863 | ERS469666 | IRGC 127937 | India                            | XI-adm     |
| IRIS 313-10870 | ERS469674 | IRGC 131966 | India                            | GJ-subtrop |
| IRIS 313-10871 | ERS469675 | IRGC 127139 | India                            | cA1        |
| IRIS 313-10888 | ERS469693 | IRGC 127943 | India                            | GJ-subtrop |
| IRIS 313-10889 | ERS469694 | NA          | India                            | GJ-subtrop |
| IRIS 313-10891 | ERS469697 | IRGC 127148 | India                            | cA1        |
| IRIS 313-10892 | ERS469698 | IRGC 127149 | India                            | cA1        |
| IRIS 313-10894 | ERS469700 | IRGC 127150 | India                            | cA1        |
| IRIS 313-10895 | ERS469711 | IRGC 127151 | India                            | GJ-subtrop |
| IRIS 313-10918 | ERS469716 | IRGC 135803 | Philippines                      | GJ-trop1   |
| IRIS 313-10922 | ERS469720 | IRGC 132264 | Lao People's Democratic Republic | GJ-subtrop |
| IRIS 313-10923 | ERS469722 | IRGC 128256 | Thailand                         | GJ-subtrop |
| IRIS 313-10927 | ERS469726 | IRGC 127828 | Nepal                            | cA2        |
| IRIS 313-10930 | ERS469729 | IRGC 127714 | Bangladesh                       | cA1        |
| IRIS 313-10936 | ERS469736 | IRGC 127504 | Indonesia                        | GJ-trop2   |
| IRIS 313-10937 | ERS469737 | IRGC 135788 | Indonesia                        | XI-3A      |
| IRIS 313-10938 | ERS469738 | NA          | Indonesia                        | XI-3A      |
| IRIS 313-10942 | ERS469741 | IRGC 127987 | Indonesia                        | XI-3A      |
| IRIS 313-10954 | ERS469755 | IRGC 127700 | Indonesia                        | XI-3A      |
| IRIS 313-10965 | ERS469767 | IRGC 127859 | Bangladesh                       | cA1        |
| IRIS 313-10975 | ERS469778 | IRGC 136183 | Bangladesh                       | XI-2A      |
| IRIS 313-10985 | ERS469789 | IRGC 132424 | Bangladesh                       | XI-2A      |
| IRIS 313-10986 | ERS469790 | IRGC 128048 | Bangladesh                       | XI-2A      |
| IRIS 313-10990 | ERS469823 | IRGC 127206 | Philippines                      | XI-3B2     |
| IRIS 313-10994 | ERS469867 | IRGC 135783 | Philippines                      | GJ-trop2   |
| IRIS 313-11005 | ERS469800 | IRGC 128140 | Indonesia                        | GJ-trop2   |
| IRIS 313-11007 | ERS469803 | IRGC 128141 | Indonesia                        | GJ-trop2   |
| IRIS 313-11016 | ERS469813 | IRGC 128328 | Bangladesh                       | cA1        |
| IRIS 313-11024 | ERS469821 | IRGC 127217 | Pakistan                         | cA1        |
| IRIS 313-11027 | ERS469825 | IRGC 127454 | Pakistan                         | cA1        |
| IRIS 313-11032 | ERS469830 | IRGC 127710 | Pakistan                         | cB         |
| IRIS 313-11037 | ERS469836 | IRGC 128211 | Pakistan                         | cA1        |
| IRIS 313-11039 | ERS469838 | IRGC 128093 | China                            | XI-1A      |
| IRIS 313-11043 | ERS469842 | NA          | Malaysia                         | XI-3A      |
| IRIS 313-11044 | ERS469843 | IRGC 128005 | Malaysia                         | GJ-trop1   |
| IRIS 313-11045 | ERS469844 | IRGC 128039 | Malaysia                         | GJ-trop1   |
| IRIS 313-11046 | ERS469846 | NA          | Malaysia                         | GJ-trop1   |
| IRIS 313-11047 | ERS469847 | IRGC 127977 | Bangladesh                       | cA1        |
| IRIS 313-11048 | ERS469848 | IRGC 127178 | Bangladesh                       | cA1        |
| IRIS 313-11050 | ERS469850 | IRGC 127180 | Bangladesh                       | cA2        |
| IRIS 313-11051 | ERS469851 | IRGC 127181 | Bangladesh                       | cA2        |
| IRIS 313-11053 | ERS469853 | IRGC 127183 | Bangladesh                       | cA1        |
| IRIS 313-11054 | ERS469854 | IRGC 127184 | Bangladesh                       | cA2        |
| IRIS 313-11055 | ERS469855 | IRGC 127185 | Bangladesh                       | cA2        |
| IRIS 313-11056 | ERS469857 | IRGC 127186 | Bangladesh                       | cA2        |
| IRIS 313-11057 | ERS469858 | IRGC 127187 | Bangladesh                       | cA2        |
| IRIS 313-11059 | ERS469860 | IRGC 127189 | Bangladesh                       | cA2        |
| IRIS 313-11062 | ERS469863 | IRGC 127218 | Bangladesh                       | cB         |
| IRIS 313-11063 | ERS469864 | IRGC 135741 | Bangladesh                       | cA2        |
| IRIS 313-11064 | ERS469865 | IRGC 132306 | Bangladesh                       | cA2        |
| IRIS 313-11083 | ERS469916 | IRGC 132248 | Lao People's Democratic Republic | XI-3B1     |
| IRIS 313-11089 | ERS469884 | IRGC 127824 | Cambodia                         | XI-adm     |
| IRIS 313-11094 | ERS469889 | IRGC 132274 | Lao People's Democratic Republic | GJ-subtrop |



|                |           |             |               |          |
|----------------|-----------|-------------|---------------|----------|
| IRIS 313-11097 | ERS469892 | IRGC 127478 | Philippines   | XI-3B2   |
| IRIS 313-11098 | ERS469893 | IRGC 134993 | Sierra Leone  | XI-3A    |
| IRIS 313-11102 | ERS469898 | NA          | Liberia       | GJ-trop1 |
| IRIS 313-11103 | ERS469899 | IRGC 132329 | Liberia       | GJ-trop1 |
| IRIS 313-11104 | ERS469900 | IRGC 131978 | Liberia       | GJ-trop1 |
| IRIS 313-11112 | ERS469909 | IRGC 128308 | Bangladesh    | cA2      |
| IRIS 313-11118 | ERS469915 | IRGC 135797 | Viet Nam      | XI-3B1   |
| IRIS 313-11163 | ERS469965 | IRGC 127652 | Bangladesh    | cA2      |
| IRIS 313-11191 | ERS469980 | IRGC 127763 | Sri Lanka     | cA2      |
| IRIS 313-11202 | ERS469993 | IRGC 127920 | China         | GJ-temp  |
| IRIS 313-11205 | ERS469996 | IRGC 128075 | Bangladesh    | XI-2A    |
| IRIS 313-11218 | ERS470009 | IRGC 127982 | Bangladesh    | cB       |
| IRIS 313-11224 | ERS470016 | IRGC 128130 | Bangladesh    | XI-2A    |
| IRIS 313-11229 | ERS470021 | IRGC 128171 | Bangladesh    | XI-2A    |
| IRIS 313-11238 | ERS470031 | NA          | Brazil        | GJ-trop1 |
| IRIS 313-11239 | ERS470032 | IRGC 127978 | Indonesia     | XI-adm   |
| IRIS 313-11241 | ERS470034 | IRGC 128001 | Bangladesh    | XI-adm   |
| IRIS 313-11242 | ERS470036 | IRGC 128121 | India         | XI-adm   |
| IRIS 313-11256 | ERS470051 | IRGC 127941 | India         | XI-2A    |
| IRIS 313-11257 | ERS470052 | IRGC 127944 | India         | XI-adm   |
| IRIS 313-11258 | ERS470053 | IRGC 127948 | India         | cB       |
| IRIS 313-11260 | ERS470055 | IRGC 127950 | India         | XI-adm   |
| IRIS 313-11262 | ERS470058 | IRGC 127952 | India         | XI-2A    |
| IRIS 313-11265 | ERS470061 | IRGC 132242 | India         | cA1      |
| IRIS 313-11267 | ERS470073 | IRGC 127956 | India         | XI-2A    |
| IRIS 313-11273 | ERS470137 | IRGC 127962 | India         | XI-2A    |
| IRIS 313-11277 | ERS470065 | IRGC 127157 | India         | cA2      |
| IRIS 313-11279 | ERS470067 | IRGC 127967 | India         | XI-adm   |
| IRIS 313-11289 | ERS470078 | IRGC 127971 | India         | cB       |
| IRIS 313-11298 | ERS470088 | IRGC 127152 | India         | cA1      |
| IRIS 313-11301 | ERS470091 | IRGC 127963 | India         | XI-2A    |
| IRIS 313-11323 | ERS470115 | IRGC 127455 | Bangladesh    | cA2      |
| IRIS 313-11338 | ERS470130 | IRGC 128097 | Philippines   | XI-3B2   |
| IRIS 313-11345 | ERS470138 | IRGC 127891 | Philippines   | XI-3B2   |
| IRIS 313-11350 | ERS470143 | IRGC 127983 | India         | cB       |
| IRIS 313-11351 | ERS470144 | IRGC 127986 | India         | XI-2A    |
| IRIS 313-11395 | ERS470187 | IRGC 135755 | Indonesia     | XI-3A    |
| IRIS 313-11416 | ERS470207 | IRGC 127529 | India         | XI-2A    |
| IRIS 313-11436 | ERS468653 | IRGC 127779 | Cote d'Ivoire | GJ-trop1 |
| IRIS 313-11453 | ERS468669 | IRGC 127916 | India         | XI-2B    |
| IRIS 313-11461 | ERS468676 | IRGC 127881 | India         | XI-2B    |
| IRIS 313-11467 | ERS468681 | IRGC 128372 | Philippines   | XI-3A    |
| IRIS 313-11480 | ERS468691 | IRGC 127742 | India         | XI-1B2   |
| IRIS 313-11483 | ERS468694 | IRGC 128244 | Bangladesh    | cA1      |
| IRIS 313-11484 | ERS468695 | IRGC 127357 | Bangladesh    | cA2      |
| IRIS 313-11489 | ERS468700 | IRGC 127482 | India         | cA1      |
| IRIS 313-11512 | ERS468721 | IRGC 127693 | Philippines   | XI-3B2   |
| IRIS 313-11513 | ERS468722 | IRGC 127269 | Ecuador       | XI-1B2   |
| IRIS 313-11567 | ERS468762 | IRGC 127766 | Nepal         | cB       |
| IRIS 313-11580 | ERS468774 | IRGC 127840 | China         | XI-3B2   |
| IRIS 313-11602 | ERS468789 | IRGC 127597 | India         | cA1      |
| IRIS 313-11617 | ERS468795 | IRGC 128495 | India         | cA1      |
| IRIS 313-11618 | ERS468796 | IRGC 127879 | India         | cA1      |
| IRIS 313-11625 | ERS468804 | IRGC 127281 | Nepal         | cB       |
| IRIS 313-11626 | ERS468805 | IRGC 127395 | Nepal         | cB       |
| IRIS 313-11630 | ERS468809 | IRGC 127737 | Nepal         | cB       |
| IRIS 313-11635 | ERS468812 | IRGC 128294 | Thailand      | XI-3B1   |

|                |           |             |                   |            |
|----------------|-----------|-------------|-------------------|------------|
| IRIS 313-11642 | ERS468818 | IRGC 127661 | India             | XI-2B      |
| IRIS 313-11643 | ERS468819 | IRGC 127662 | India             | XI-1B2     |
| IRIS 313-11644 | ERS468820 | IRGC 127663 | India             | XI-2B      |
| IRIS 313-11645 | ERS468822 | IRGC 127664 | India             | XI-2B      |
| IRIS 313-11646 | ERS468823 | IRGC 127665 | India             | XI-2A      |
| IRIS 313-11647 | ERS468824 | IRGC 127666 | India             | XI-2B      |
| IRIS 313-11648 | ERS468825 | IRGC 127667 | India             | XI-adm     |
| IRIS 313-11651 | ERS468827 | IRGC 128291 | China             | GJ-temp    |
| IRIS 313-11652 | ERS468828 | IRGC 128303 | China             | GJ-temp    |
| IRIS 313-11655 | ERS468832 | IRGC 127815 | China             | GJ-temp    |
| IRIS 313-11656 | ERS468833 | IRGC 127196 | Indonesia         | XI-adm     |
| IRIS 313-11657 | ERS468834 | NA          | Nigeria           | XI-2A      |
| IRIS 313-11659 | ERS468836 | IRGC 132047 | Sierra Leone      | GJ-trop1   |
| IRIS 313-11661 | ERS468838 | IRGC 131960 | Bhutan            | GJ-temp    |
| IRIS 313-11663 | ERS468839 | IRGC 128383 | Zimbabwe          | XI-2B      |
| IRIS 313-11664 | ERS468840 | IRGC 127288 | China             | XI-adm     |
| IRIS 313-11665 | ERS468842 | IRGC 127464 | China             | XI-1A      |
| IRIS 313-11667 | ERS468844 | IRGC 127580 | China             | XI-1A      |
| IRIS 313-11668 | ERS468845 | IRGC 127771 | China             | XI-1A      |
| IRIS 313-11669 | ERS468846 | IRGC 131986 | China             | XI-adm     |
| IRIS 313-11671 | ERS468847 | IRGC 127313 | Nepal             | XI-adm     |
| IRIS 313-11673 | ERS468849 | IRGC 128248 | Philippines       | GJ-trop1   |
| IRIS 313-11674 | ERS468850 | IRGC 131971 | Thailand          | XI-3B1     |
| IRIS 313-11677 | ERS468852 | IRGC 128286 | Thailand          | XI-3B1     |
| IRIS 313-11681 | ERS468856 | IRGC 132426 | Thailand          | XI-adm     |
| IRIS 313-11683 | ERS468858 | IRGC 127677 | Thailand          | XI-3B1     |
| IRIS 313-11684 | ERS468859 | IRGC 132021 | Thailand          | XI-3B1     |
| IRIS 313-11685 | ERS468860 | IRGC 127735 | Thailand          | XI-3B1     |
| IRIS 313-11686 | ERS468861 | IRGC 132366 | Thailand          | XI-3B1     |
| IRIS 313-11687 | ERS468862 | IRGC 132297 | Thailand          | XI-3B1     |
| IRIS 313-11689 | ERS468864 | IRGC 128275 | Republic of Korea | GJ-temp    |
| IRIS 313-11691 | ERS468866 | IRGC 128467 | Bhutan            | GJ-subtrop |
| IRIS 313-11692 | ERS468867 | IRGC 127273 | Taiwan            | XI-1A      |
| IRIS 313-11693 | ERS468868 | IRGC 127278 | Taiwan            | XI-3B2     |
| IRIS 313-11700 | ERS468881 | IRGC 127306 | Thailand          | XI-3B1     |
| IRIS 313-11704 | ERS468921 | NA          | Thailand          | XI-adm     |
| IRIS 313-11705 | ERS468932 | IRGC 127303 | Thailand          | XI-3B1     |
| IRIS 313-11706 | ERS468935 | IRGC 132001 | Thailand          | XI-3A      |
| IRIS 313-11707 | ERS468944 | IRGC 132403 | Thailand          | XI-3B1     |
| IRIS 313-11708 | ERS468872 | IRGC 127518 | Thailand          | XI-3B1     |
| IRIS 313-11709 | ERS468873 | IRGC 132010 | Thailand          | XI-3B1     |
| IRIS 313-11710 | ERS468874 | IRGC 134992 | Thailand          | XI-3B1     |
| IRIS 313-11711 | ERS468875 | IRGC 132295 | Thailand          | XI-3B1     |
| IRIS 313-11717 | ERS468880 | IRGC 127450 | Indonesia         | XI-adm     |
| IRIS 313-11719 | ERS468882 | IRGC 127304 | Thailand          | XI-3B1     |
| IRIS 313-11720 | ERS468883 | IRGC 127302 | Thailand          | XI-3B1     |
| IRIS 313-11721 | ERS468884 | IRGC 127372 | Thailand          | XI-3B1     |
| IRIS 313-11722 | ERS468885 | IRGC 128327 | Bangladesh        | XI-adm     |
| IRIS 313-11723 | ERS468886 | IRGC 127320 | Guinea            | XI-2A      |
| IRIS 313-11725 | ERS468888 | IRGC 128514 | Japan             | GJ-temp    |
| IRIS 313-11727 | ERS468890 | IRGC 127416 | China             | XI-1A      |
| IRIS 313-11728 | ERS468891 | IRGC 127581 | China             | XI-adm     |
| IRIS 313-11730 | ERS468893 | IRGC 127753 | China             | XI-adm     |
| IRIS 313-11731 | ERS468894 | IRGC 127754 | China             | XI-adm     |
| IRIS 313-11732 | ERS468895 | IRGC 127755 | China             | XI-1A      |
| IRIS 313-11733 | ERS468896 | IRGC 127801 | China             | XI-1A      |
| IRIS 313-11734 | ERS468897 | IRGC 127803 | China             | XI-1A      |

|                |           |             |               |            |
|----------------|-----------|-------------|---------------|------------|
| IRIS 313-11736 | ERS468899 | IRGC 127595 | Philippines   | GJ-trop1   |
| IRIS 313-11737 | ERS468900 | IRGC 127283 | India         | cA1        |
| IRIS 313-11738 | ERS468902 | IRGC 127720 | India         | XI-2B      |
| IRIS 313-11739 | ERS468903 | IRGC 128398 | Ghana         | GJ-trop1   |
| IRIS 313-11740 | ERS468904 | IRGC 127872 | Ghana         | XI-3B2     |
| IRIS 313-11741 | ERS468905 | IRGC 127407 | Sri Lanka     | XI-2B      |
| IRIS 313-11742 | ERS468906 | IRGC 127480 | India         | cA2        |
| IRIS 313-11744 | ERS468908 | IRGC 127114 | China         | XI-3B2     |
| IRIS 313-11745 | ERS468909 | IRGC 127123 | China         | XI-1A      |
| IRIS 313-11746 | ERS468910 | IRGC 127349 | China         | XI-1A      |
| IRIS 313-11748 | ERS468912 | IRGC 127378 | China         | XI-3B2     |
| IRIS 313-11752 | ERS468915 | IRGC 127584 | China         | XI-1A      |
| IRIS 313-11753 | ERS468916 | IRGC 127894 | China         | XI-1A      |
| IRIS 313-11755 | ERS468918 | IRGC 131961 | Liberia       | GJ-trop1   |
| IRIS 313-11756 | ERS468919 | IRGC 131970 | Madagascar    | GJ-trop1   |
| IRIS 313-11758 | ERS468922 | IRGC 131987 | Cote d'Ivoire | XI-2A      |
| IRIS 313-11759 | ERS468923 | IRGC 131995 | Cote d'Ivoire | GJ-trop1   |
| IRIS 313-11761 | ERS468925 | IRGC 127683 | Cote d'Ivoire | XI-2B      |
| IRIS 313-11762 | ERS468926 | IRGC 127682 | Madagascar    | XI-2A      |
| IRIS 313-11764 | ERS468928 | IRGC 127697 | Liberia       | XI-adm     |
| IRIS 313-11765 | ERS468929 | IRGC 127696 | Liberia       | cB         |
| IRIS 313-11772 | ERS468933 | IRGC 128452 | Madagascar    | XI-2B      |
| IRIS 313-11786 | ERS468942 | IRGC 128411 | Gambia        | XI-3B1     |
| IRIS 313-11787 | ERS468943 | IRGC 127845 | Gambia        | XI-2A      |
| IRIS 313-11788 | ERS468945 | IRGC 127247 | Philippines   | GJ-temp    |
| IRIS 313-11789 | ERS468946 | IRGC 127774 | Madagascar    | XI-2B      |
| IRIS 313-11790 | ERS468947 | IRGC 127883 | Madagascar    | GJ-trop2   |
| IRIS 313-11791 | ERS468948 | IRGC 127885 | Madagascar    | XI-2B      |
| IRIS 313-11794 | ERS468971 | IRGC 127867 | Madagascar    | XI-2B      |
| IRIS 313-11795 | ERS468982 | IRGC 127291 | China         | XI-1A      |
| IRIS 313-11796 | ERS468993 | IRGC 127345 | China         | XI-1A      |
| IRIS 313-11797 | ERS469003 | IRGC 128289 | China         | XI-1A      |
| IRIS 313-11799 | ERS469024 | IRGC 127366 | China         | XI-1A      |
| IRIS 313-11800 | ERS469031 | IRGC 136098 | China         | GJ-temp    |
| IRIS 313-11801 | ERS468950 | IRGC 127368 | China         | XI-adm     |
| IRIS 313-11802 | ERS468951 | IRGC 127460 | China         | XI-1A      |
| IRIS 313-11804 | ERS468953 | IRGC 128441 | China         | XI-1A      |
| IRIS 313-11805 | ERS468954 | IRGC 127895 | China         | XI-1A      |
| IRIS 313-11807 | ERS468956 | IRGC 127757 | Colombia      | XI-adm     |
| IRIS 313-11809 | ERS468958 | IRGC 128387 | Kenya         | cA1        |
| IRIS 313-11810 | ERS468959 | IRGC 132036 | Kenya         | XI-3B1     |
| IRIS 313-11811 | ERS468961 | IRGC 127632 | Kenya         | XI-adm     |
| IRIS 313-11812 | ERS468962 | IRGC 127175 | Kenya         | XI-3B1     |
| IRIS 313-11813 | ERS468963 | IRGC 132372 | Kenya         | XI-3B1     |
| IRIS 313-11814 | ERS468964 | IRGC 127523 | Kenya         | XI-3B1     |
| IRIS 313-11815 | ERS468965 | IRGC 127633 | Kenya         | XI-3B1     |
| IRIS 313-11817 | ERS468967 | IRGC 128085 | Myanmar       | XI-adm     |
| IRIS 313-11819 | ERS468969 | IRGC 132362 | Myanmar       | XI-3B1     |
| IRIS 313-11820 | ERS468970 | IRGC 127709 | Myanmar       | XI-3B1     |
| IRIS 313-11821 | ERS468972 | IRGC 127096 | India         | XI-2B      |
| IRIS 313-11822 | ERS468973 | IRGC 135738 | India         | XI-2B      |
| IRIS 313-11823 | ERS468974 | IRGC 127223 | India         | XI-adm     |
| IRIS 313-11824 | ERS468975 | IRGC 127317 | India         | XI-2B      |
| IRIS 313-11825 | ERS468976 | IRGC 135753 | India         | cB         |
| IRIS 313-11832 | ERS468984 | IRGC 131964 | Thailand      | GJ-subtrop |
| IRIS 313-11842 | ERS468995 | NA          | Thailand      | XI-3A      |
| IRIS 313-11887 | ERS469057 | IRGC 127434 | Philippines   | XI-1B1     |

|                |           |             |                                  |            |
|----------------|-----------|-------------|----------------------------------|------------|
| IRIS 313-11897 | ERS469039 | IRGC 128431 | Thailand                         | GJ-subtrop |
| IRIS 313-11900 | ERS469042 | IRGC 128435 | Thailand                         | GJ-subtrop |
| IRIS 313-11920 | ERS469064 | IRGC 127386 | Thailand                         | XI-2A      |
| IRIS 313-11924 | ERS469069 | IRGC 128400 | Thailand                         | GJ-subtrop |
| IRIS 313-11929 | ERS469074 | IRGC 127385 | Philippines                      | GJ-trop1   |
| IRIS 313-11941 | ERS469086 | IRGC 128394 | Burkina Faso                     | XI-1B2     |
| IRIS 313-11945 | ERS469090 | IRGC 127598 | Bangladesh                       | XI-2A      |
| IRIS 313-11963 | ERS469108 | IRGC 127491 | India                            | cA2        |
| IRIS 313-11978 | ERS469124 | IRGC 127440 | Philippines                      | XI-1B1     |
| IRIS 313-12029 | ERS469163 | IRGC 132278 | Lao People's Democratic Republic | GJ-subtrop |
| IRIS 313-12048 | ERS469180 | IRGC 127564 | Indonesia                        | XI-3A      |
| IRIS 313-12057 | ERS469189 | IRGC 127116 | China                            | XI-3B2     |
| IRIS 313-12058 | ERS469190 | IRGC 132406 | Cambodia                         | XI-3B1     |
| IRIS 313-12071 | ERS469203 | IRGC 128406 | Lao People's Democratic Republic | GJ-subtrop |
| IRIS 313-12094 | ERS469210 | IRGC 127496 | Bangladesh                       | cB         |
| IRIS 313-12118 | ERS469218 | IRGC 127691 | Madagascar                       | XI-2B      |
| IRIS 313-12129 | ERS469223 | IRGC 128391 | Lao People's Democratic Republic | GJ-subtrop |
| IRIS 313-12134 | ERS469228 | IRGC 135802 | Lao People's Democratic Republic | GJ-subtrop |
| IRIS 313-12135 | ERS469229 | IRGC 127726 | Malaysia                         | XI-1B1     |
| IRIS 313-12141 | ERS469232 | IRGC 132399 | Bangladesh                       | cA2        |
| IRIS 313-12183 | ERS469248 | IRGC 127796 | Nepal                            | cA1        |
| IRIS 313-12228 | ERS469267 | IRGC 128474 | Lao People's Democratic Republic | GJ-subtrop |
| IRIS 313-12234 | ERS469271 | IRGC 127124 | China                            | XI-1B2     |
| IRIS 313-12258 | ERS469285 | IRGC 128283 | Lao People's Democratic Republic | GJ-subtrop |
| IRIS 313-12265 | ERS469335 | IRGC 128352 | Lao People's Democratic Republic | GJ-subtrop |
| IRIS 313-12275 | ERS469293 | IRGC 127590 | China                            | XI-3B2     |
| IRIS 313-12289 | ERS469307 | IRGC 132304 | Myanmar                          | GJ-subtrop |
| IRIS 313-12307 | ERS469320 | IRGC 132034 | Lao People's Democratic Republic | GJ-subtrop |
| IRIS 313-12312 | ERS469325 | IRGC 128482 | Lao People's Democratic Republic | GJ-subtrop |
| IRIS 313-12321 | ERS469328 | IRGC 127557 | Lao People's Democratic Republic | GJ-subtrop |
| IRIS 313-12323 | ERS469330 | IRGC 135563 | Lao People's Democratic Republic | GJ-subtrop |
| IRIS 313-12349 | ERS469349 | IRGC 127592 | Lao People's Democratic Republic | GJ-subtrop |
| IRIS 313-12351 | ERS469351 | IRGC 135759 | Lao People's Democratic Republic | GJ-subtrop |
| IRIS 313-15908 | ERS467765 | IRGC 126955 | Colombia                         | cA2        |
| IRIS 313-15910 | ERS467767 | IRGC 126956 | United States of America         | GJ-trop1   |
| IRIS 313-7685  | ERS468582 | IRGC 122089 | Philippines                      | XI-1B1     |
| IRIS 313-7688  | ERS468560 | IRGC 122091 | Philippines                      | XI-1B1     |
| IRIS 313-7689  | ERS468576 | IRGC 122092 | Philippines                      | XI-1B1     |
| IRIS 313-7807  | ERS468569 | IRGC 122284 | Senegal                          | XI-1B1     |
| IRIS 313-7816  | ERS468567 | IRGC 122288 | Senegal                          | XI-1B1     |
| IRIS 313-7826  | ERS468566 | IRGC 122292 | Senegal                          | XI-1B1     |
| IRIS 313-7902  | ERS468619 | IRGC 122101 | Philippines                      | GJ-trop1   |
| IRIS 313-7914  | ERS468607 | IRGC 122115 | Cote d'Ivoire                    | GJ-trop1   |
| IRIS 313-8173  | ERS468510 | IRGC 121959 | United States of America         | GJ-trop1   |
| IRIS 313-8312  | ERS468239 | IRGC 131932 | Malaysia                         | XI-3A      |
| IRIS 313-8321  | ERS467775 | IRGC 120894 | Bangladesh                       | cA2        |
| IRIS 313-8326  | ERS467814 | IRGC 117494 | India                            | cB         |
| IRIS 313-8341  | ERS467930 | IRGC 121599 | Viet Nam                         | XI-3B2     |
| IRIS 313-8391  | ERS468241 | NA          | Burkina Faso                     | XI-2A      |
| IRIS 313-8407  | ERS468242 | NA          | Malaysia                         | XI-3A      |
| IRIS 313-8436  | ERS468435 | IRGC 126307 | Indonesia                        | GJ-trop2   |
| IRIS 313-8493  | ERS468246 | IRGC 128537 | Indonesia                        | XI-3A      |
| IRIS 313-8530  | ERS468211 | IRGC 126199 | India                            | XI-2A      |
| IRIS 313-8557  | ERS468247 | IRGC 131956 | Malaysia                         | XI-3A      |
| IRIS 313-8568  | ERS467875 | IRGC 125619 | India                            | XI-2B      |
| IRIS 313-8595  | ERS468250 | IRGC 126240 | Madagascar                       | XI-2B      |
| IRIS 313-8606  | ERS468213 | IRGC 131926 | India                            | XI-3A      |

|               |           |             |                   |            |
|---------------|-----------|-------------|-------------------|------------|
| IRIS 313-8616 | ERS467956 | IRGC 131939 | Philippines       | XI-1B1     |
| IRIS 313-8641 | ERS467862 | IRGC 120876 | Bangladesh        | cA1        |
| IRIS 313-8681 | ERS468253 | NA          | Guinea            | XI-3A      |
| IRIS 313-8703 | ERS468256 | IRGC 124432 | Bangladesh        | XI-2A      |
| IRIS 313-8721 | ERS467780 | IRGC 120969 | Bangladesh        | cA2        |
| IRIS 313-8725 | ERS468259 | IRGC 126262 | Indonesia         | XI-3A      |
| IRIS 313-8755 | ERS468320 | IRGC 126120 | Japan             | GJ-temp    |
| IRIS 313-8813 | ERS467771 | IRGC 117425 | India             | cB         |
| IRIS 313-8864 | ERS467823 | IRGC 121069 | Bangladesh        | cA1        |
| IRIS 313-8925 | ERS467992 | IRGC 125813 | Sri Lanka         | XI-2B      |
| IRIS 313-8948 | ERS467998 | IRGC 126974 | Philippines       | XI-3B1     |
| IRIS 313-8988 | ERS468007 | IRGC 125672 | India             | XI-2B      |
| IRIS 313-9020 | ERS468013 | IRGC 126983 | Thailand          | XI-3B1     |
| IRIS 313-9039 | ERS467824 | IRGC 121441 | Sri Lanka         | XI-2B      |
| IRIS 313-9044 | ERS467876 | IRGC 125971 | Philippines       | XI-1B1     |
| IRIS 313-9048 | ERS467897 | IRGC 125930 | Bhutan            | GJ-subtrop |
| IRIS 313-9066 | ERS468017 | IRGC 125659 | Bangladesh        | XI-adm     |
| IRIS 313-9067 | ERS468018 | IRGC 125681 | Bangladesh        | XI-2A      |
| IRIS 313-9121 | ERS468027 | IRGC 125802 | Thailand          | XI-2A      |
| IRIS 313-9156 | ERS468219 | IRGC 126200 | Bangladesh        | XI-2A      |
| IRIS 313-9262 | ERS468048 | IRGC 125785 | Bangladesh        | XI-2A      |
| IRIS 313-9294 | ERS468283 | IRGC 131929 | Gambia            | XI-adm     |
| IRIS 313-9301 | ERS467891 | IRGC 126068 | Indonesia         | GJ-trop2   |
| IRIS 313-9409 | ERS468225 | IRGC 131937 | Malaysia          | XI-3A      |
| IRIS 313-9422 | ERS467785 | IRGC 120915 | Bangladesh        | cA2        |
| IRIS 313-9626 | ERS467787 | IRGC 121005 | Bangladesh        | cA2        |
| IRIS 313-9682 | ERS467908 | IRGC 135548 | Bangladesh        | cB         |
| IRIS 313-9922 | ERS468126 | IRGC 125778 | Republic of Korea | XI-1B2     |
| IRIS 313-9966 | ERS468133 | IRGC 125713 | Colombia          | XI-1B2     |

---

## Supplementary S2

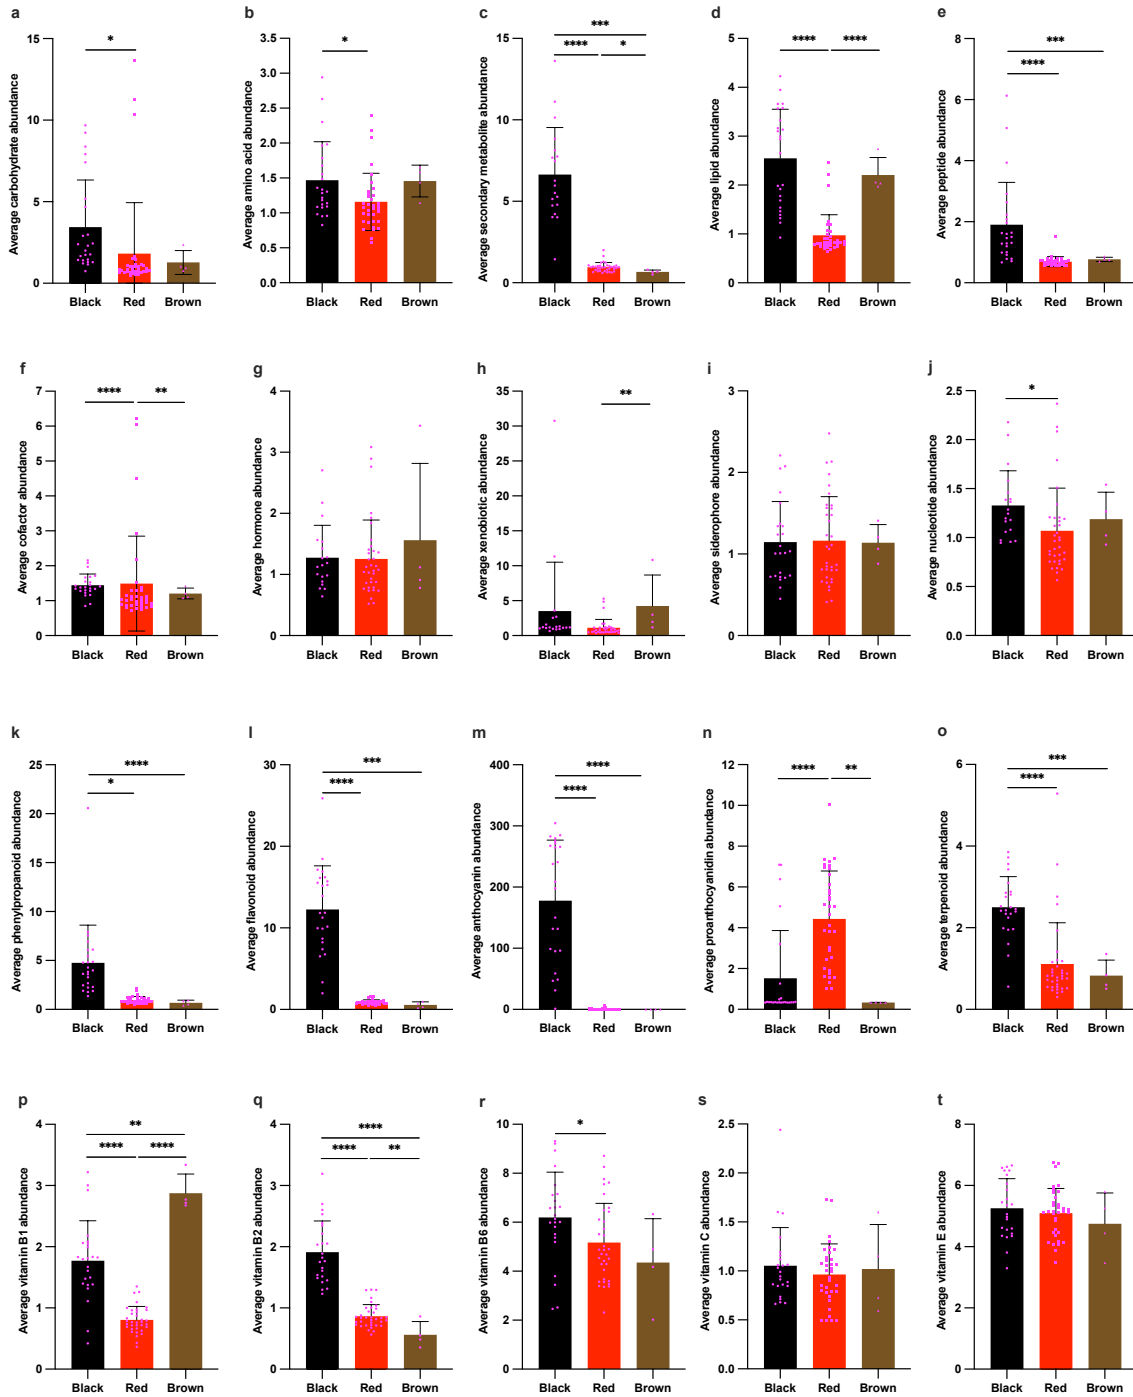

**Supplementary Fig. 3. Comparison of the average metabolite abundance among pigmented rice varieties.** Unpaired *t*-test comparing black ( $n=24$ ) and red ( $n=35$ ), black and brown ( $n=4$ ), and red and brown rice. a) Carbohydrates. b) Amino acids. c) Secondary metabolites. d) Lipids. e) Peptides. f) Cofactors. g) Hormones. h) Xenobiotics. i) Siderophores. j) Nucleotides. k) Phenylpropanoids. l) Flavonoids. m) Anthocyanins. n) Proanthocyanidins. o) Terpenoids. p) Vitamin B1, q) Vitamin B2, r) Vitamin B6, s) Vitamin C, and t) Vitamin E. Data are presented as mean values with the error bars denoting 95% confidence intervals. Asterisks on the graph represent significant differences: \*,  $p < 0.05$ ; \*\*,  $p < 0.01$ ; \*\*\*,  $p < 0.001$ ; \*\*\*\*,  $p < 0.0001$ .

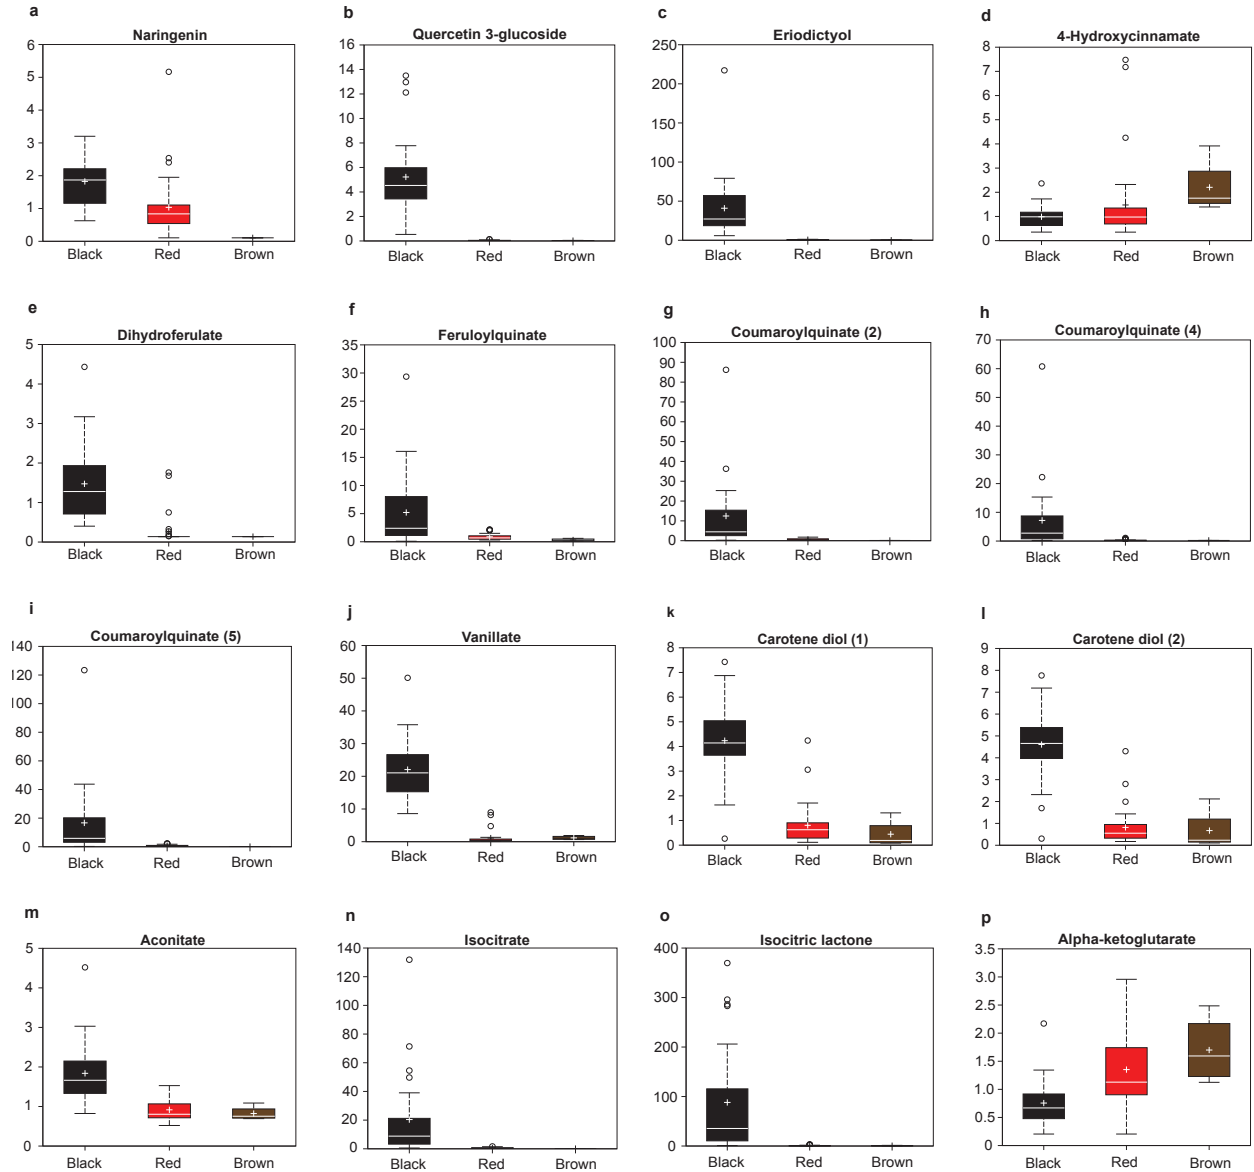

**Supplementary Fig. 4. Box plots of selected secondary metabolites differing significantly by the grain color variable.** Black ( $n=24$ ), red ( $n=35$ ), and brown ( $n=4$ ) rice varieties. a) Naringenin. b) Quercetin 3-glucoside. c) Eriodictyol. d) 4-hydroxycinnamate. e) Dihydroferulate. f) Feruloylquininate (2). g) Coumaroylquininate (2). h) Coumaroylquininate (4). i) Coumaroylquininate (5). j) Vanillate. k) Carotene diol (1). l) Carotene diol (2). m) Aconitate. n) Isocitrate. o) Isocitrate lactone. p) Alpha-ketoglutarate. Box denotes 25<sup>th</sup> and 75<sup>th</sup> percentiles; line within box denotes 50<sup>th</sup> percentile; the solid bar across the box represents the median value while the “+” symbol indicates the mean value; whisker denotes standard deviation and outliers are represented by circles above the box.

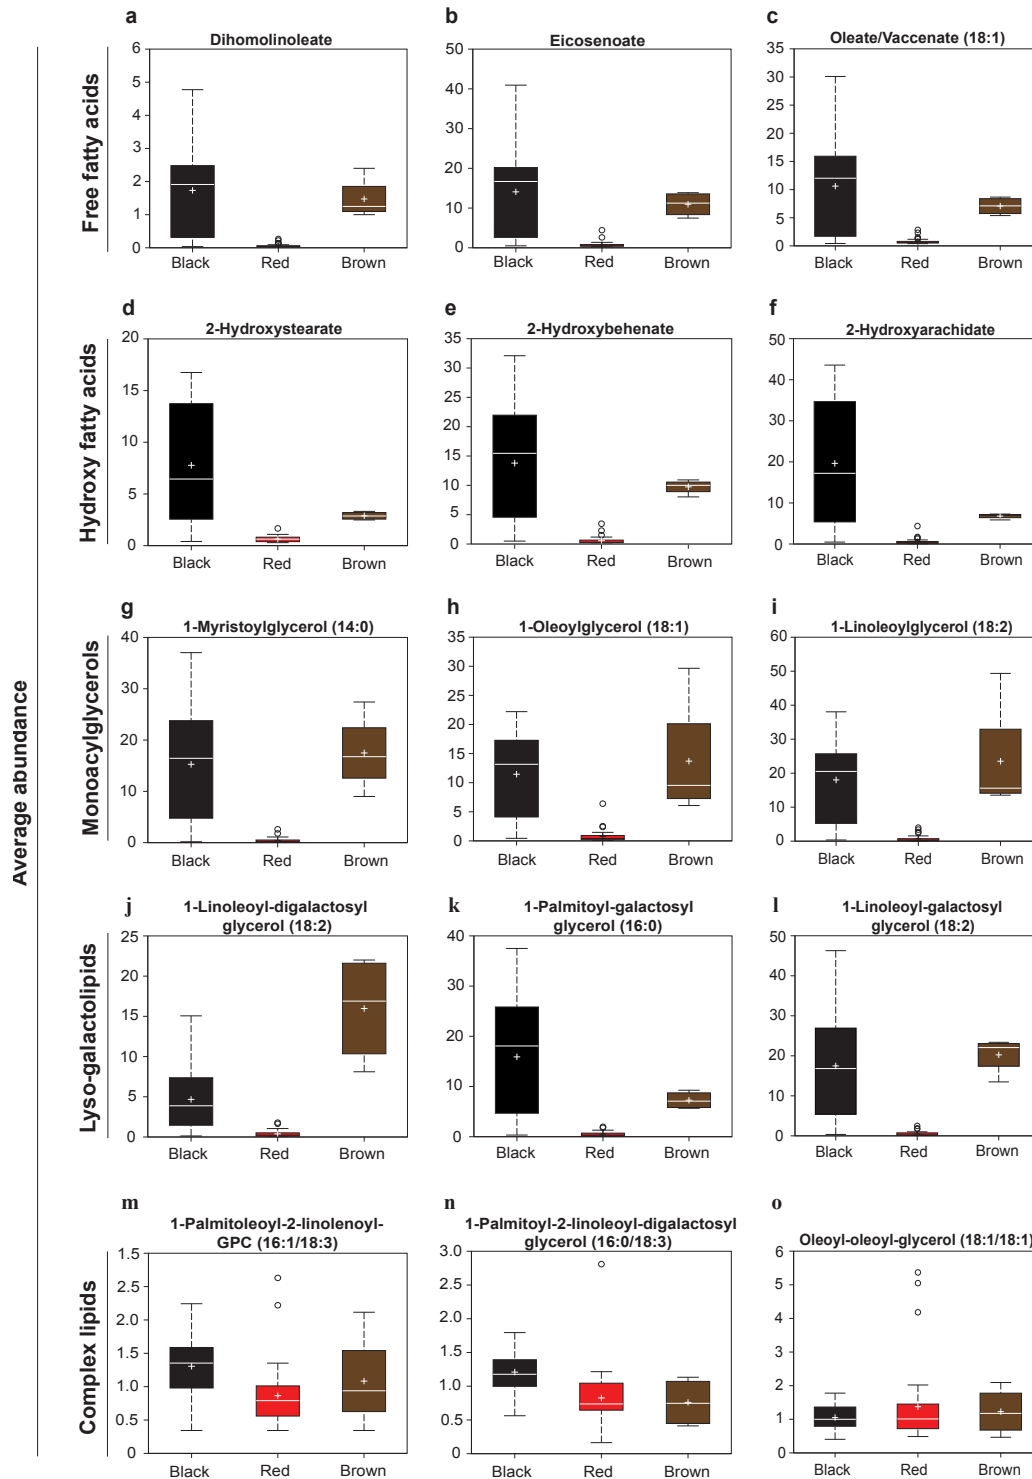

**Supplementary Fig. 5. Box plots showing examples of lipid species differentially expressed in the different types of pigmented rice.** Black ( $n=24$ ), red ( $n=35$ ), and brown ( $n=4$ ) rice varieties. Five lipid classes, including free fatty acids (a–c), hydroxy fatty acids (d–f), monoacylglycerols (g–i), *lyso*-galactolipids (j–l), and complex lipids (m–o). Box denotes 25<sup>th</sup> and 75<sup>th</sup> percentiles; line within box denotes 50<sup>th</sup> percentile; the solid bar across the box represents the median value while the “+” symbol indicates the mean value; whisker denotes standard deviation and outliers are represented by circles above the box.



## Supplementary S3

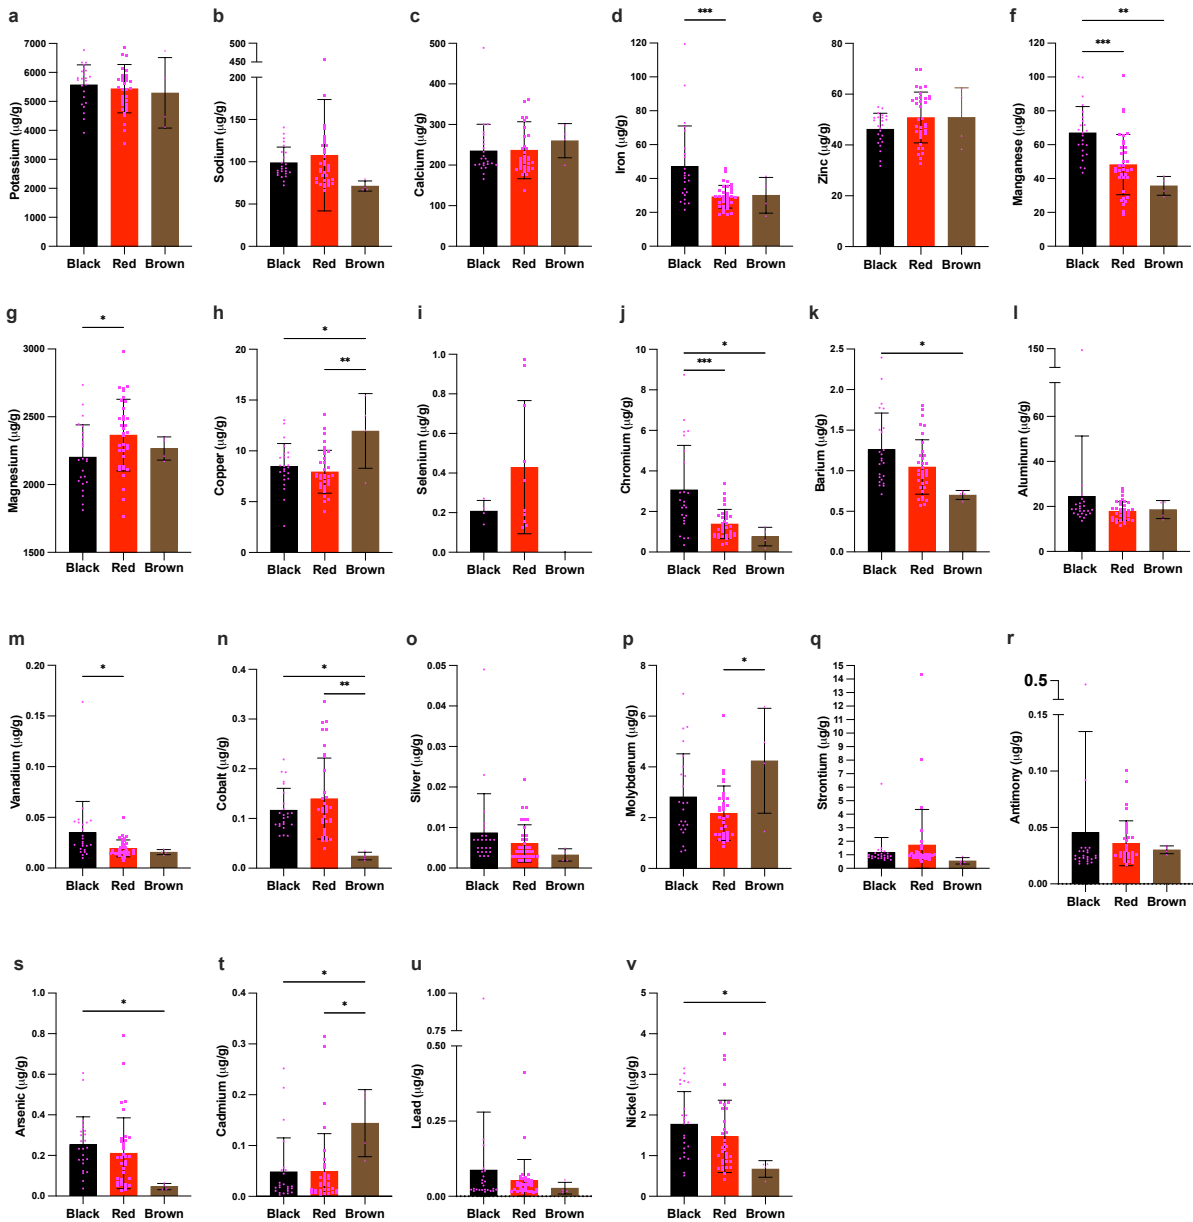

**Supplementary Fig. 6. Metal ion profiling of the pigmented rice.** One-way ANOVA test was performed to compare the metal ion contents of the black ( $n=24$ ), red ( $n=35$ ), and brown ( $n=4$ ) rice samples. a) Potassium. b) Sodium. c) Calcium. d) Iron. e) Zinc. f) Manganese. g) Magnesium. h) Copper. i) Selenium. j) Chromium. k) Barium. l) Aluminum. m) Vanadium. n) Cobalt. o) Silver. p) Molybdenum. q) Strontium. r) Antimony. s) Arsenic. t) Cadmium. u) Lead. v) Nickel. Data are presented as mean values with the error bars denoting 95% confidence intervals. Asterisks indicate significant differences: \*,  $p < 0.05$ ; \*\*,  $p < 0.01$ ; and \*\*\*,  $p < 0.001$ .

### **Relationship between grain pigments and metal ions**

To investigate relationship between pigment enrichment in the rice grain and metal ion concentration, we performed a correlation test between anthocyanin or proanthocyanidins and the 22 trace metal ion concentrations using GraphPad Prism 9.3.1. Pearson's correlation coefficients (R) and P-values (P) were calculated. The correlation was considered to be significant at 0.05 level. The abundance of anthocyanin was positively correlated with Fe, Mn, V, Cr, Mo, and B and negatively correlated with Mg. However, the abundance of proanthocyanidins was negatively correlated with Fe, Cr, and Mo concentrations (Supplementary File 5). These inverse relationships detected for Fe, Cr, and Mo and anthocyanin/ proanthocyanidins were not previously reported for whole grain rice varieties and merits further mechanistic investigation.

## **Supplementary S4**

### **Methods**

**Embryogenic callus induction and regeneration.** Mature dry seeds of Cempo Ireng (local to the Yogyakarta region, Indonesia) were used in this study. The seeds were dehusked and sterilized with 70% ethanol for 1 min and 30% (v/v) commercial bleach (5.25% sodium hypochlorite) for 40 min with continuous shaking, and then rinsed five times with sterilized distilled water and dried on Whatman paper for 5 min. For callus induction, 36 seeds were inoculated per Petri dish on the callus-induction media 2N6 or 2NBK (modified from the protocol developed by Hiei and Komari <sup>11</sup> and incubated at 30°C and 32°C in the dark or under continuous light for 7 d. All culture media components and preparations are detailed in Supplementary S6. The use of 2NBK medium at 32°C under continuous light were selected as the best conditions for callus induction based on the induced callus mass and quality.

The scutella were subcultured onto fresh 2NBK medium for another seven days under the same conditions. The embryogenic calli were induced by subculturing the calli on nNBK for five days at 32°C. Ten different regeneration media were developed and tested for shoot induction based on MS medium and different growth regulator combinations (Supplementary S6). The embryogenic calli were selected and placed on the tested media at 32°C under continuous light for 14 days. The regeneration frequency was calculated based on the number of regenerated shoots compared with the total number of calli. For the development of roots, the regenerated shoots were transferred into magenta boxes containing MSRO rooting medium under the same temperature and light conditions.

**Agrobacterium-mediated transformation.** The binary vector (pRGEB32) used in this study contains *Hygromycin phosphotransferase (Hpt)* as a selectable marker under the control of the *CaMV 35S* promoter, and the *Cas9* gene under the control of the rice *Ubiquitin* promoter. The vector was transferred into *Agrobacterium tumefaciens* strain EHA105 by electroporation in a Bio-Rad Laboratories *Escherichia coli* pulser. Bacterial culture and transformation were conducted according to Hiei and Komari <sup>11</sup>, with some modifications. After the co-cultivation step, the calli were placed on the first selection medium (NBKCH20) for 14 days and were then moved to the second selection medium (nNBKCH40) for five days. The calli were incubated in all steps from callus induction to the rooting stage at 32°C and under continuous light, except for the co-cultivation step, which took place at 25°C in the dark. The embryogenic calli were placed on the R8H5 medium containing 5 mg hygromycin for selection. The regenerated shoots were grown on the rooting medium (MSROH5), after which the seedlings were acclimatized in the soil and greenhouse conditions.

**Genomic DNA extraction and genotyping.** Total genomic DNA was extracted from approximately 0.5 g of fresh leaves from the transformed plants using the DNAquick Plant System (Tiangen Biotech), according to the manufacturer's protocol. A PCR screening was performed to amplify 240 bp of the CRISPR transgene using Phusion High-Fidelity DNA Polymerase (Thermo Fisher Scientific) and the Cas9-F7/Nos-R7 primer pair (Supplementary Table 8). The PCR products were analyzed by gel electrophoresis on 1% agarose gels.

**Phenotyping of CRISPR/Cas9-targeted Cempo Ireng mutants.** The genome-engineered plants and the wild-type controls were grown in the KAUST greenhouse rooms at 28°C under natural sunlight. Fifteen random homozygous

mutants were selected (5 plants per target) and 5 wild-type controls for detailed agronomic trait analysis. The heading date was recorded as the first day on which the first panicle emerged. The plant height was measured on the same day using the measuring scale. The plants were grown until fully mature, at which point the plant tillers were counted, the panicles were harvested, the number of filled and unfilled spikelet were counted in each panicle and based on that seed setting rate (the ratio of number of filled grains to total number of spikelets) was calculated. The rough, paddy rice grain length and width were measured by ImageJ software, and 1000 paddy grains had husk removed and were cleaned prior to weight measurements with a sensitive electronic balance (0.001 g sensitivity). The total yield per plant was measured as the total grams of grain collected per plant. All data were statistically analyzed by unpaired *t*-test using GraphPad Prism 9.3.1. and significant difference were indicated by asterisks: \*,  $p < 0.05$ ; \*\*,  $p < 0.01$ ; \*\*\*,  $p < 0.001$ ; \*\*\*\*,  $p < 0.0001$ .

## **Supplementary S5**

### **Results**

#### **Establishment of a regeneration and transformation system for BR**

To establish a regeneration protocol for Cempo Ireng, we tested callus inducibility using the established protocol for *japonica* and *indica* rice developed by Hiei and Komari<sup>11</sup> with some modification. We used the mature grains of Cempo Ireng for *in vitro* callus induction. We tested the medium we developed (CIM57) and another two media developed by Hiei and Komari<sup>11</sup> with our modifications (see Supplementary S6, below), called 2N6 and 2NBK. We also tested two different incubation temperatures (30°C and 32°C) and two different light conditions (complete darkness and continuous light).

No callus was induced using CIM57 supplemented with dicamba and 1-naphthaleneacetic acid (NAA) growth regulators; however, a typical yellowish and friable callus mass emerged from the grain using media containing 2,4-dichlorophenoxyacetic acid (2N6 and 2NBK) under all test conditions (Supplementary Fig. 7e). We observed an increase in the number of induced calli when the temperature was increased to 32°C and in the presence of light. Callus induction frequency varied between 26.3% and 30.6% across the tested conditions, with the highest callus induction frequency obtained using 2NBK at 32°C in light (Supplementary Fig. 7e). Based on these results, we selected 2NBK as the best callus-induction medium and 32°C and continuous light as the conditions for the further regeneration and rooting stages (Supplementary Fig. 7).

Somatic embryos were successfully induced on the nNBKC medium containing a high concentration of sorbitol (55 g/L) and sucrose (20 g/L) (Supplementary S6). We tested ten different Murashige and Skoog (MS) basal media supplemented with different concentrations of various growth regulators (R1–R10) for their shoot induction abilities (Supplementary Fig. 7f, Supplementary S6). We did not achieve regeneration using R1, R5, and R7; however, the other seven media induced green shoots after 12–16 days of cultivation, with frequencies ranging from 33.3% to 83.3%. The highest regeneration frequency (83.3%) was achieved using R8 medium, which contained a 1:2 combination of NAA and BAP (Supplementary Fig. 7f). The shoots were healthy and developed a good root system on MSRO rooting medium for maturation into a seedling. For acclimatization, the seedlings were transferred into a greenhouse room at 28°C.

Next, we used our optimized regeneration protocol to establish a genetic transformation protocol. We tested the *Agrobacterium tumefaciens*–mediated protocol developed by Hiei and Komari<sup>11</sup> to transform proliferating Cempo Ireng calli. We used the pRGE32 vector harboring hygromycin as a selectable marker and delivered it into *Agrobacterium tumefaciens* strain EHA105. We transfected the induced calli and selected them using 20 mg/L hygromycin for 14 days and 40 mg/L hygromycin for five days (Supplementary Fig. 8b-c). We observed no shoot regeneration of the transformed calli in the presence of a high concentration of hygromycin (50 mg/L). To determine the optimal hygromycin concentration for selection of transformed calli, we tested different levels of hygromycin (5–50 mg/L), and found that 5 mg/L was sufficient for selection of transformed shoots (Supplementary Fig. 8d). Using

these conditions, we found that 78.7% of the regenerated plants had successfully integrated T-DNA sequence into their genome.

### **Supplementary S6**

#### **Media Setup:**

**CIM57:** Add 4.3 g Murashige and Skoog (MS) basal medium, 30 g sucrose, 1 g casein hydrolysate. Adjust pH to 5.8 and add 4 g agar and 3 g Gelzan. Autoclave at 121°C for 20 min, cool to 60°C, then add 2 mg of filter-sterilized dicamba and 10 mg of filter-sterilized AgNO<sub>3</sub>.

**2N6:** Add 100 mL of 10× N6 major salts, 10 mL of 100× N6 minor salts, 10 mL of 100× N6 vitamins, 10 mL of 100× FeEDTA, and 20 mL of 100 mg 2,4- dichlorophenoxyacetic acid (2,4-D) to 800 mL distilled water. Dissolve 0.5 g L-proline, 0.5 g casein hydrolysate, 0.1 g myoinositol, and 30 g sucrose in the solution, then make up the volume to 900 mL. Adjust pH to 5.8 and add 4 g phytigel. Autoclave at 121°C for 20 min, cool to 60°C, then add 100 mL of 10× AA amino acids (pH 5.8).

**2NBK:** Add 100 mL of 10× N6K major salts, 10 mL of 100× B5 minor salts, 10 mL of 100× B5 vitamins, 10 mL of 100× FeEDTA, and 20 mL of 100 mg 2,4-D to 800 mL distilled water. Dissolve 0.5 g L-proline, 0.5 g casein hydrolysate, and 30 g maltose and make up the volume to 900 mL. Adjust pH to 5.8 and add 4 g phytigel. Autoclave at 121°C for 20 min, cool to 60°C, then add 100 mL of 10× AA amino acids (pH 5.8).

**NBKCH20:** Add 0.4 mL of 50 mg/mL hygromycin B, and 1 mL of 200 mg/mL timentin to the autoclaved 1L 2NBK medium after cooling to 60°C.

**nNBKC:** Add 100 mL of 10× N6K major salts, 10 mL of 100× B5 minor salts, 10 mL of 100× B5 vitamins, 10 mL of 100× FeEDTA, 10 mL of 100 mg 2,4-D, 0.5 mg 1-naphthaleneacetic acid (NAA), and 0.1 mg 6-benzylaminopurine (BAP) to 800 mL distilled water. Dissolve 0.5 g L-proline, 0.5 g casein hydrolysate, 20 g sucrose, 55 gm D-sorbitol, and make up the volume to 1000 mL. Adjust pH to 5.8 and add 5 g phytigel. Autoclave at 121°C for 20 min, cool to 60°C.

**nNBKCH40:** Add 0.8 mL of 50 mg/mL hygromycin, and 1 mL of 200 mg/mL timentin to the autoclaved 1L nNBKC medium after cooling to 60°C.

**R1:** Add 4.3 g MS basal medium, 30 g sucrose, 0.1 mg gibberellic acid (GA), and 0.5 mg BAP. Adjust pH to 5.8, add 4 g phytigel, and autoclave at 121°C for 20 min.

**R2:** Add 4.3 g MS basal medium, 30 g sucrose, 0.5 mg BAP, 0.5 mg thidiazuron, 0.5 mg kinetin, and 0.5 mg NAA. Adjust pH to 5.8, add 4 g phytigel, and autoclave at 121°C for 20 min.

**R3:** Add 4.3 g MS basal medium, 30 g sucrose, 2 mg BAP, and 0.5 mg kinetin. Adjust pH to 5.8, add 4 g phytigel, and autoclave at 121°C for 20 min.

**R4:** Add 4.3 g MS basal medium, 30 g sucrose, 2 mg BAP, and 0.5 mg thidiazuron. Adjust pH to 5.8, add 4 g phytigel, and autoclave at 121°C for 20 min.

**R5:** Add 4.3 g MS basal medium, 30 g sucrose, 0.5 mg thidiazuron, and 2 mg kinetin. Adjust pH to 5.8, add 4 g phytigel, and autoclave at 121°C for 20 min.

**R6:** Add 4.3 g MS basal medium, 30 g sucrose, 1 mg BAP, 0.5 mg kinetin, and 0.5 mg NAA. Adjust pH to 5.8, add 4 g phytigel, and autoclave at 121°C for 20 min.

**R7:** Add 4.3 g MS basal medium, 30 g sucrose, 1 mg BAP, 1 mg thidiazuron, and 0.5 mg NAA. Adjust pH to 5.8, add 4 g phytigel, and autoclave at 121°C for 20 min.

**R8:** Add 4.3 g MS basal medium, 30 g sucrose, 2 mg BAP, and 1 mg NAA. Adjust pH to 5.8, add 4 g phytigel, and autoclave at 121°C for 20 min.

**R9:** Add 4.3 g MS basal medium, 30 g sucrose, 1 mg kinetin, and 1 mg NAA. Adjust pH to 5.8, add 4 g phytigel, and autoclave at 121°C for 20 min.

**R10:** Add 4.3 g MS basal medium, 30 g sucrose, 1 mg BAP, 1 mg kinetin, and 1 mg NAA. Adjust pH to 5.8, add 4 g phytigel, and autoclave at 121°C for 20 min.

**R8H5:** Add 0.1 mL of 50 mg/mL hygromycin B to the autoclaved 1L R8 medium after cooling to 60°C.

**MSRO:** Add 2.2 g MS basal medium, 10 g sucrose, and 0.5 g casein hydrolysate to 950 mL distilled water. Adjust pH to 5.8 and add 4 g phytigel. Autoclave at 121°C for 20 min, cool to 60°C.

**MSROH5:** Add 0.1 mL of 50 mg/mL hygromycin B to the autoclaved 1L MSRO medium after cooling to 60°C.

**Preparation of stock solutions:** see Hiei and Komari <sup>11</sup>

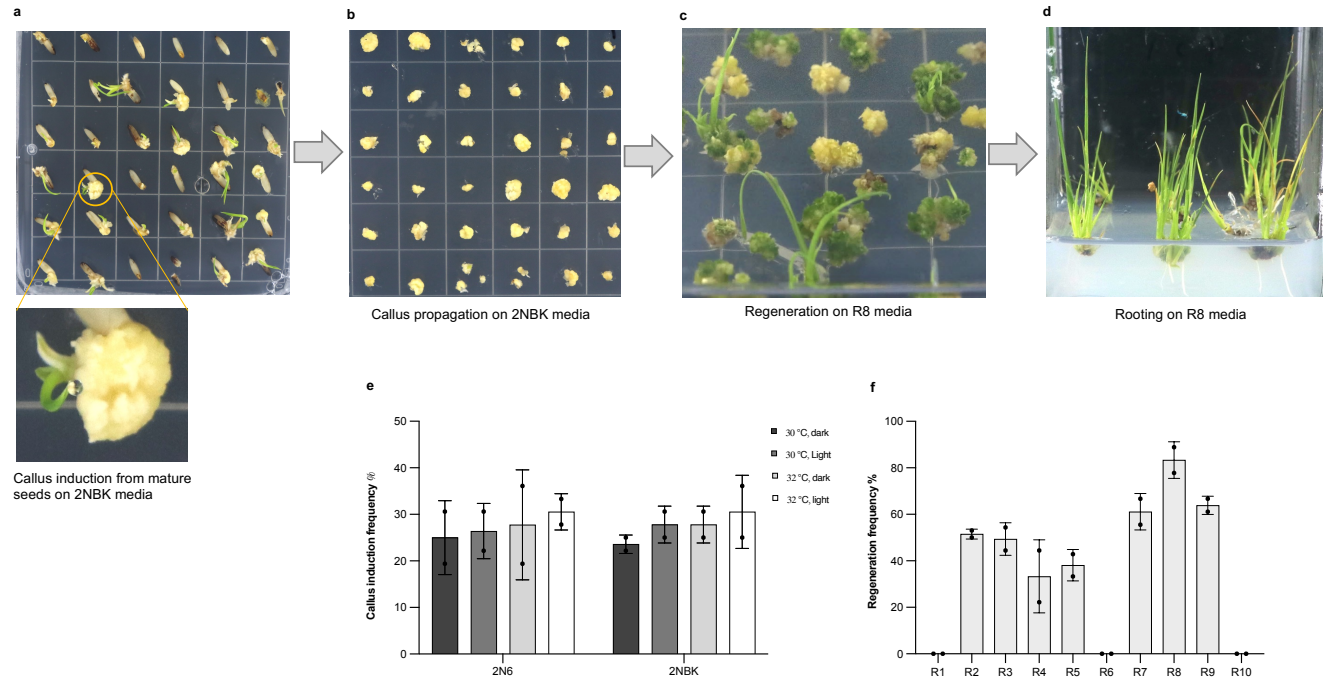

**Supplementary Fig. 7. Main steps of the establishment of a regeneration protocol for Cempo Ireng.** a) Callus was induced from mature seeds on 2NBK medium. b) Callus propagation on fresh 2NBK medium. c) Shoot induction using R8 medium. d) Rooting on MSRO medium. e) Callus induction frequency from rice grains using 2N6 and 2NBK media under 30 °C in the dark, 30 °C in the light, 32 °C in the dark, or 32 °C in light. Data show the percentage mean values  $\pm$  95% confidence interval of two independent experiments ( $n = 36$ ). f) Regeneration frequency of Cempo Ireng on 10 different regeneration media recipes (R1–R10) was calculated and represented as percent mean values  $\pm$  SE of regenerated shoots from 585 callus in two independent experiments.

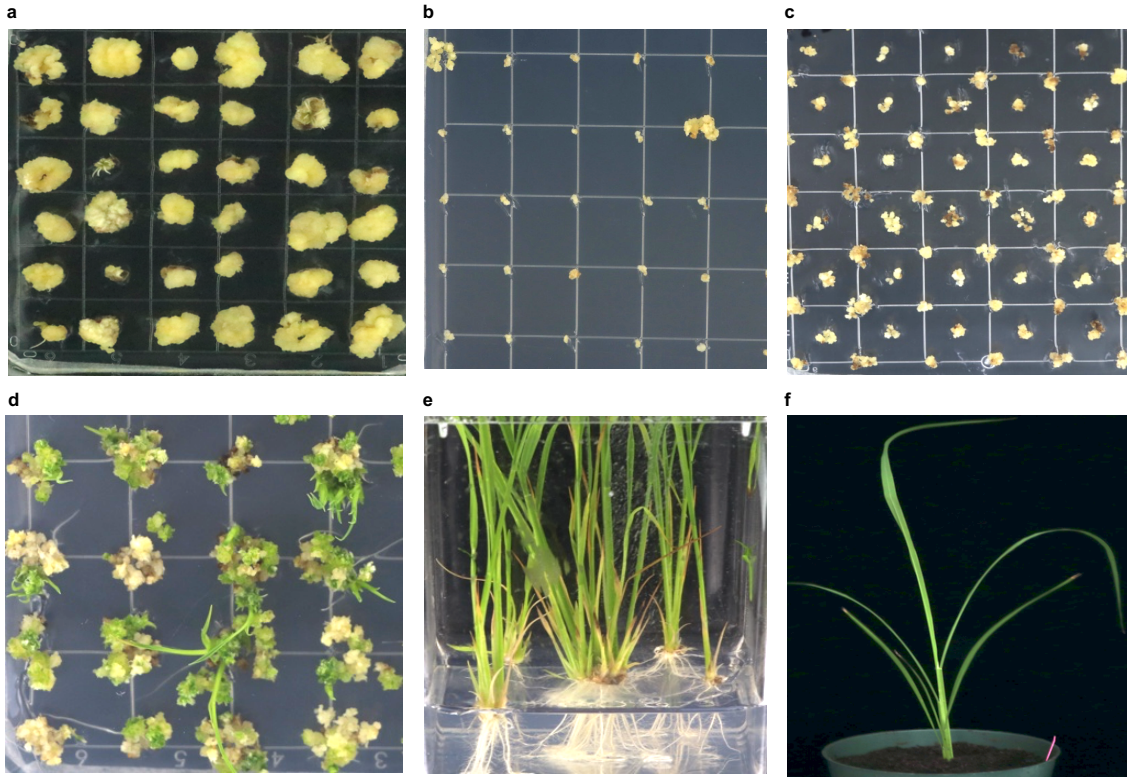

**Supplementary Fig. 8. Different stages of the *Agrobacterium*-mediated transformation of Cempo Ireng.** a) Embryogenic-like callus induction on callus-induction medium. b) First selection of transformed calli after co-cultivation on NBKCH20 medium containing 20 mg/L hygromycin and 200 mg/L timentin. c) Second selection of the surviving calli on the nNBKCH40 medium containing 40 mg/L hygromycin and 200 mg/L timentin. d) Shoot regeneration from antibiotic-resistant putative transformant calli on R8 regeneration medium containing 5 mg/L hygromycin. e) Rooting of putative transformed shootlets on  $\frac{1}{2}$  MS medium containing 5 mg/L hygromycin. f) Soil acclimatization of the plantlets in the greenhouse condition.

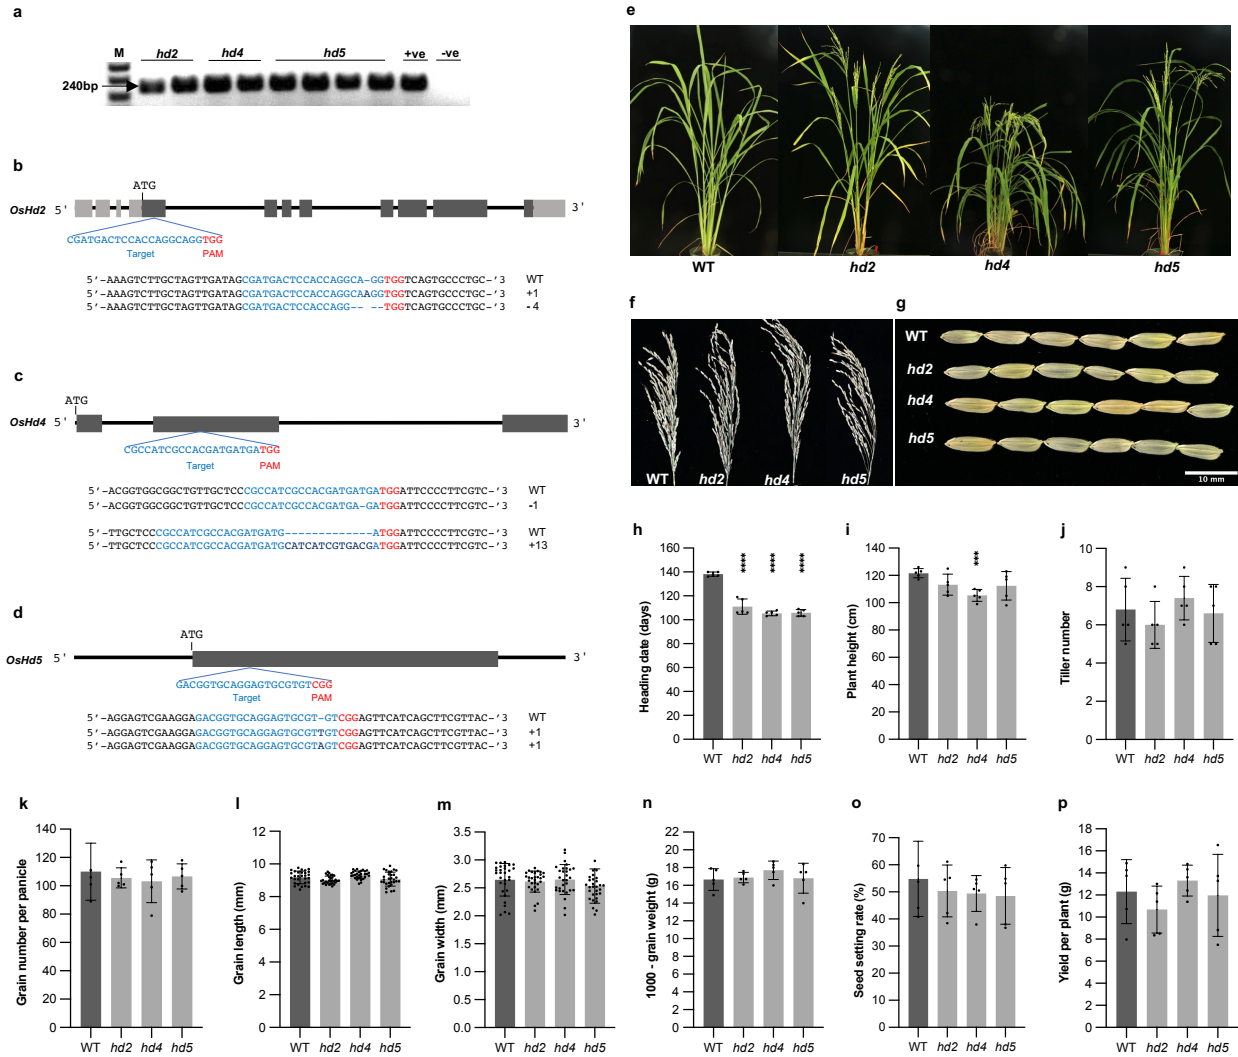

**Supplementary Fig. 9. CRISPR/Cas9-induced knockout of three repressors of heading date in rice.** a) Gel electrophoresis of the PCR products (240 bp) amplified from the T-DNA sequence in the engineered rice plants (*hd2*, *hd4*, *hd5*). b–d) Schematic map of the *Hd2* (b), *Hd4* (c), and *Hd5* (d) genomic loci and sgRNA target sites in Cempo Ireng. The PAM (NGG) is shown in red. A sequence alignment of the target region in the wild-type (WT) and mutant T1 lines shows the different insertion/deletions in the mutant lines. e) Representative image taken at the time of flowering in the mutant lines (*hd2*, *hd4*, and *hd5*), although the WT was not yet flowering. f) Representative image showing the morphology of the main panicles of the WT and mutant lines. g) Grain phenotypes of the mutant lines and WT, scale bar, 10 mm. h–p) Unpaired *t*-test comparing the heading-and yield-related traits of the mutant lines (each  $n=5$ ) and WT ( $n=5$ ). Data are presented as mean values with the error bars denoting 95% confidence intervals. Asterisks indicate significant differences to the WT: \*,  $p<0.05$ ; \*\*\*,  $p<0.001$ ; \*\*\*\*,  $p<0.0001$ . h) Heading date. i) Plant height. j) Tiller number. k) Average grain number per panicle. l) Grain length, ( $n=30$ ). m) Grain width, ( $n=30$ ). n) Thousand-grain weight. o) Seed setting rate. p) Yield per plant.

a



|          |                                                                                 |
|----------|---------------------------------------------------------------------------------|
| Hd2-WT   | MMGTAHHNQTAGSALGVGVGDANDAVPGAGGGYSDDPGGPTSGVQPPPVQCWERFIQKKTIKVLLVESDDSTRQVV    |
| Hd2-50.2 | MMGTAHHNQTAGSALGVGVGDANDAVPGAGGGYSDDPGGPTSGVQPPPVQCWERFIQKKTIKVLLVESDDSTRQGG    |
| Hd2-WT   | SALLRHCMEYEVIPAENGQAWTYLEDMQNSIDLVLTEVVMGVSIGISLLSRIMNHKNIPVIMMSSNDAMGTVFK      |
| Hd2-50.2 | QCPASSLHV*                                                                      |
| Hd2-WT   | CLSKGAVDFLVKPIRKNELKNLWQHVVRRRCHSSSSGSGSEGIQTQKCAKSKSGDESNNNSGNSDDDDDDGVIMGLNA  |
| Hd2-50.2 |                                                                                 |
| Hd2-WT   | RDGSDNGSGTQAQSSWTKRAVEIDSPQAMSPQLADPPDSTCAQVIHLKSDICSNRWLPCSTSNKNSKKQKETNDDFK   |
| Hd2-50.2 |                                                                                 |
| Hd2-WT   | GKDLEIGSPRNLNTAYQSSPNERISIKPTDRRNEYPLQNSKEAAMENLEESSVRAADLIGSMAKNMDAQQAAARATNA  |
| Hd2-50.2 |                                                                                 |
| Hd2-WT   | PNCSSKVPKDKNRDNIMPSLESLKRSRSTGDNANAIQEEQRNVLRSDLSAFTRYHTPVASNQGGTGVFGVCSGP      |
| Hd2-50.2 |                                                                                 |
| Hd2-WT   | HDNSSEAMKTDAYSANMKSNSDAAPIKQSGNSGSSNNNDMGSTTKNVVTKPSTNKERVMSPSAVKANGHTSAFHPAQHW |
| Hd2-50.2 |                                                                                 |
| Hd2-WT   | TSPANTTGKEKTDEVANNAAKRAQPGEVQSNLVQHPRPILHYVNFVDSRENGGSGAPQCGSSNVFDPPEVGHAAANYG  |
| Hd2-50.2 |                                                                                 |
| Hd2-WT   | VNGSNGSNGSNGQNGSTTAVNAERPMEIANGTINKSGPGGGNGSGSGGNDMYLKRFTQREHRVAAVIKFRQKR       |
| Hd2-50.2 |                                                                                 |
| Hd2-WT   | KERNFGKVVRYQSRKRLAEQRPRVRGQFVRQAVQDQQQGGGREAADR*                                |
| Hd2-50.2 |                                                                                 |

**b**

|          |                                                                              |
|----------|------------------------------------------------------------------------------|
| Hd4-WT   | MGMANEESPNYQVKKGGRIPPRSSLIYPFMSMGPAAGGCGLCGADGGGCCSRHRHDDDGFPFVFPSPACQIGIGAP |
| Hd4-67.4 | MGMANEESPNYQVKKGGRIPPRSSLIYPFMSMGPAAGGCGLCGADGGGCCSRHRHDDASS*                |
| Hd4-WT   | APPVHEFQFFGNDGGDDGESVAWLFDDYPPSPVAAAAGMHRQPPYDGVVAPPFLFRNTGAGGLTFDVSLLGGRP   |
| Hd4-67.4 |                                                                              |
| Hd4-WT   | DLDAGLGLGGGSGRHAEEAASATIMSYCGSTFTAASSMPKEMVAAMADVGESLNPNTVVGAMVEREAKLMRYKEKR |
| Hd4-67.4 |                                                                              |
| Hd4-WT   | SLNPNTVVGAMVEREAKLMRYKEKRKRCYEKQIRYASRKAYAEMRPRVRGRFAKEADQEAVAPPSTYVDPSRLELG |
| Hd4-67.4 |                                                                              |
| Hd4-WT   | QWFR*                                                                        |
| Hd4-67.4 |                                                                              |

**c**

|          |                                                                              |
|----------|------------------------------------------------------------------------------|
| Hd5-WT   | MKSRKSYGHLLSPVGSPPSDNESGAAAAAAGGGGCGSSAGYVVYGGGGGDSPAKEQDRFLPIANVSRIMKRSLE   |
| Hd5-81.3 | MKSRKSYGHLLSPVGSPPSDNESGAAAAAAGGGGCGSSAGYVVYGGGGGDSPAKEQDRFLPIANVSRIMKRSLE   |
| Hd5-WT   | ANAKISKEAKETVQECVSEFISFVTGEASDKCQREKRKTINGDDLWAMTTLGFEAYVGPLKSYLNRYREAEGEKAA |
| Hd5-81.3 | ANAKISKEAKETVQECVVGVHQLRYRRGLRQVPAREAEHQRRRPLGHDHAGVRLRRPAQVLPQPLPRGRGREGR   |
| Hd5-WT   | VLGGAGGAAAARHGEGCCGGGGADGVVIDGHSPLAGLSSHGHQDGGGDVGLMMGGGAAGVGNAGAGSTT        |
| Hd5-81.3 | RARRRRRRRGAPRRRGLRRRRRRRRRRRRRAFPARRRPVTLTPWSSAAGRRRRRRRAHDGWRRRRRRVQRRGRVDD |
| Hd5-WT   | TAFYAPAATAASGNKAYCGDGSRVMEFEGIGGEEESGGGGGGERGFAGHLHGQVWFRKLRSTN*             |
| Hd5-81.3 | DGVLRAAGDGGVREQGVLRRRRRVEGDGVRGRRRRRGERRRRRRREGVRRPPWRAMV*                   |

**Supplementary Fig. 10. Protein sequence alignment of the CRISPR mutants and the wild type (Cempo Ireng).** Examples of the *hd2*, *hd4*, and *hd5* mutants with deletions or insertions. a) *hd2-50.2* has one nucleotide insertion. b) *hd4-67.4* has 13 nucleotide insertions. c) *hd5-81.3* has one nucleotide insertion. These indels changed the downstream amino acid sequence and created a premature stop codon in all mutant lines. Protein sequence upstream of the cut site is highlighted with yellow.

**Supplementary Table 7. Genotyping of the T0 and T1 edited plants.** The mutant lines are listed. Table shows the targeted gene, mutant generation, plant ID, the genotype detected compared to the wild-type sequence and the mutation type. sgRNA, PAM, and insertion sequences are written with light blue, red, and orange respectively.

| Target | Generation | Plant ID  | Genotype                                                                                                                                                      | Mutation                                       |
|--------|------------|-----------|---------------------------------------------------------------------------------------------------------------------------------------------------------------|------------------------------------------------|
| Hd2    |            | WT        | AGTCTTGCTAGTTGAGAGCGATGACTCCACCAGGCA-GGTGGTCA                                                                                                                 | WT                                             |
|        | T0         | hd2-50    | AGTCTTGCTAGTTGAGAGCGATGACTCCACCAGGCAAGGTGGTCA +1<br>AGTCTTGCTAGTTGAGAGCGATGACTCCACCAGG-- --TGGTCA -4                                                          | Biallelic                                      |
|        | T0         | hd2-51    | AGTCTTGCTAGTTGAGAGCGATGACTCCACCAGGCAAGGTGGTCA +1<br>AGTCTTGCTAGTTGAGAGCGATGACTCCACCAGG-- --TGGTCA -4                                                          | Biallelic                                      |
|        | T1         | hd2-50.2  | AGTCTTGCTAGTTGAGAGCGATGACTCCACCAGGCAAGGTGGTCA +1<br>AGTCTTGCTAGTTGAGAGCGATGACTCCACCAGGCAAGGTGGTCA +1                                                          | Homozygous                                     |
|        | T1         | hd2-50.5  | AGTCTTGCTAGTTGAGAGCGATGACTCCACCAGG-- --TGGTCA -4<br>AGTCTTGCTAGTTGAGAGCGATGACTCCACCAGG-- --TGGTCA -4                                                          | Homozygous                                     |
|        | T1         | hd2-50.9  | AGTCTTGCTAGTTGAGAGCGATGACTCCACCAGG-- --TGGTCA -4<br>AGTCTTGCTAGTTGAGAGCGATGACTCCACCAGG-- --TGGTCA -4                                                          | Homozygous                                     |
|        | T1         | hd2-50.14 | AGTCTTGCTAGTTGAGAGCGATGACTCCACCAGG-- --TGGTCA -4<br>AGTCTTGCTAGTTGAGAGCGATGACTCCACCAGG-- --TGGTCA -4                                                          | Homozygous                                     |
|        | T1         | hd2-51.3  | AGTCTTGCTAGTTGAGAGCGATGACTCCACCAGGCAAGGTGGTCA +1<br>AGTCTTGCTAGTTGAGAGCGATGACTCCACCAGGCAAGGTGGTCA +1                                                          | Homozygous                                     |
|        | T1         | hd2-51.5  | AGTCTTGCTAGTTGAGAGCGATGACTCCACCAGG-- --TGGTCA -4<br>AGTCTTGCTAGTTGAGAGCGATGACTCCACCAGG-- --TGGTCA -4                                                          | Homozygous                                     |
|        | Hd4        |           | WT                                                                                                                                                            | GGTGGCGGCTGTTGCTCCCGCCATCGCCACGATGATGATGGATTTC |
| T0     |            | hd4-67    | GGTGGCGGCTGTTGCTCCCGCCATCGCCACGATGA-GATGGATTTC -1<br>GTTGCTCCCGCCATCGCCACGATGCATCATCGTGACGATGGATTTC +13                                                       | Biallelic                                      |
| T0     |            | hd4-68    | GGTGGCGGCTGTTGCTCCCGCCATCGCCACGATGA-GATGGATTTC -1<br>GTTGCTCCCGCCATCGCCACGATGCATCATCGTGACGATGGATTTC +13                                                       | Biallelic                                      |
| T0     |            | hd4-69    | GGTGGCGGCTGTTGCTCCCGCCATCGCCACGATGA-GATGGATTTC -1<br>GTTGCTCCCGCCATCGCCACGATGCATCATCGTGACGATGGATTTC +13                                                       | Biallelic                                      |
| T1     |            | hd4-67.1  | GTTGCTCCCGCCATCGCCACGATGCATCATCGTGACGATGGATTTC +13<br>GTTGCTCCCGCCATCGCCACGATGCATCATCGTGACGATGGATTTC +13                                                      | Homozygous                                     |
| T1     |            | hd4-67.2  | GGTGGCGGCTGTTGCTCCCGCCATCGCCACGATGA-GATGGATTTC -1<br>GGTGGCGGCTGTTGCTCCCGCCATCGCCACGATGA-GATGGATTTC -1                                                        | Homozygous                                     |
| T1     |            | hd4-67.4  | GTTGCTCCCGCCATCGCCACGATGCATCATCGTGACGATGGATTTC +13<br>GTTGCTCCCGCCATCGCCACGATGCATCATCGTGACGATGGATTTC +13                                                      | Homozygous                                     |
| T1     |            | hd4-68.3  | GGTGGCGGCTGTTGCTCCCGCCATCGCCACGATGA-GATGGATTTC -1<br>GGTGGCGGCTGTTGCTCCCGCCATCGCCACGATGA-GATGGATTTC -1                                                        | Homozygous                                     |
| T1     |            | hd4-68.7  | GGTGGCGGCTGTTGCTCCCGCCATCGCCACGATGA-GATGGATTTC -1<br>GGTGGCGGCTGTTGCTCCCGCCATCGCCACGATGA-GATGGATTTC -1                                                        | Homozygous                                     |
|        |            | WT        | CTCCAAGGAGTCGAAGGAGACGGTGCAGGAGTGCG-TGTCCGAGT                                                                                                                 | WT                                             |
|        | T0         | hd5-1     | CTCCAAGGAGTCGAAGGAGACGGTGCAGGAGTGCATGTCGGAGT +1<br>CTCCAAGGAGTCGAAGGAGACGGTGCAGGAGTGCGTGTTCGGAGT +1                                                           | Biallelic                                      |
|        | T0         | hd5-2     | CTCCAAGGAGTCGAAGGAGACGGTGCAGGAGTGCCTTGTTCGGAGT +1<br>CTCCAAGGAGTCGAAGGAGACGGTGCAGGAGTGCCTTGTTCGGAGT +1                                                        | Homozygous                                     |
|        | T0         | hd5-5     | CTCCAAGGAGTCGAAGGAGACGGTGCAGGAGTGCG-TGTCCGAGT 0<br>CTCCAAGGAGTCGAAGGAGACGGTGCAGGAGTGCCTTGTTCGGAGT +1                                                          | Heterozygous                                   |
|        | T0         | hd5-6     | CTCCAAGGAGTCGAAGGAGACGGTGCAGGAGTGCCTTGTTCGGAGT 0<br>GTGACGGAGTGCAGCGCACAGGAGTGCAGCCGAG--GTTCGGAGT -2, +30<br>CTCCAAGGAGTCGAAGGAGACGGTGCAGGAGTGCG-TGTTCGGAGT 0 | Chimeric                                       |
|        | T0         | hd5-7     | CTCCAAGGAGTCGAAGGAGACGGTGCAGGAGTGCCTTGTTCGGAGT +1<br>CTCCAAGGAGTCGAAGGAGACGGTGCAGGAGTGCCTTGTTCGGAGT +1                                                        | Chimeric                                       |
|        | T0         | hd5-8     | CTCCAAGGAGTCGAAGGAGACGGTGCAGGAGTGCCTTGTTCGGAGT +1<br>CTCCAAGGAGTCGAAGGAGACGGTGCAGGAGTGCCTTGTTCGGAGT +1                                                        | Homozygous                                     |
|        | T0         | hd5-9     | CTCCAAGGAGTCGAAGGAGACGGTGCAGGAGTGCCTTGTTCGGAGT +1<br>CTCCAAGGAGTCGAAGGAGACGGTGCAGGAGTGCCTTGTTCGGAGT +1                                                        | Biallelic                                      |



|    |                  |                                                                                                        |            |
|----|------------------|--------------------------------------------------------------------------------------------------------|------------|
| T1 | <i>hd5-8.2</i>   | CTCCAAGGAGTCGAAGGAGACGGTGCAGGAGTGCATGTCGGAGT +1<br>CTCCAAGGAGTCGAAGGAGACGGTGCAGGAGTGCATGTCGGAGT +1     | Homozygous |
| T1 | <i>hd5-8.13</i>  | CTCCAAGGAGTCGAAGGAGACGGTGCAGGAGTGCATGTCGGAGT +1<br>CTCCAAGGAGTCGAAGGAGACGGTGCAGGAGTGCATGTCGGAGT +1     | Homozygous |
| T1 | <i>hd5-79.6</i>  | CTCCAAGGAGTCGAAGGAGACGGTGCAGGAGTGCCTTGTTCGGAGT +1<br>CTCCAAGGAGTCGAAGGAGACGGTGCAGGAGTGCCTTGTTCGGAGT +1 | Homozygous |
| T1 | <i>hd5-79.10</i> | CTCCAAGGAGTCGAAGGAGACGGTGCAGGAGTGCCTTGTTCGGAGT +1<br>CTCCAAGGAGTCGAAGGAGACGGTGCAGGAGTGCCTTGTTCGGAGT +1 | Homozygous |
| T1 | <i>hd5-79.17</i> | CTCCAAGGAGTCGAAGGAGACGGTGCAGGAGTGCCTTGTTCGGAGT +1<br>CTCCAAGGAGTCGAAGGAGACGGTGCAGGAGTGCCTTGTTCGGAGT +1 | Homozygous |
| T1 | <i>hd5-80.11</i> | CTCCAAGGAGTCGAAGGAGACGGTGCAGGAGTGCATGTCGGAGT +1<br>CTCCAAGGAGTCGAAGGAGACGGTGCAGGAGTGCATGTCGGAGT +1     | Homozygous |
| T1 | <i>hd5-80.12</i> | CTCCAAGGAGTCGAAGGAGACGGTGCAGGAGTGCATGTCGGAGT +1<br>CTCCAAGGAGTCGAAGGAGACGGTGCAGGAGTGCATGTCGGAGT +1     | Homozygous |
| T1 | <i>hd5-81.3</i>  | CTCCAAGGAGTCGAAGGAGACGGTGCAGGAGTGCCTTGTTCGGAGT +1<br>CTCCAAGGAGTCGAAGGAGACGGTGCAGGAGTGCCTTGTTCGGAGT +1 | Homozygous |
| T1 | <i>hd5-81.4</i>  | CTCCAAGGAGTCGAAGGAGACGGTGCAGGAGTGCCTTGTTCGGAGT +1<br>CTCCAAGGAGTCGAAGGAGACGGTGCAGGAGTGCCTTGTTCGGAGT +1 | Homozygous |
| T1 | <i>hd5-82.1</i>  | CTCCAAGGAGTCGAAGGAGACGGTGCAGGAGTGCATGTCGGAGT +1<br>CTCCAAGGAGTCGAAGGAGACGGTGCAGGAGTGCATGTCGGAGT +1     | Homozygous |
| T1 | <i>hd5-82.2</i>  | CTCCAAGGAGTCGAAGGAGACGGTGCAGGAGTGCATGTCGGAGT +1<br>CTCCAAGGAGTCGAAGGAGACGGTGCAGGAGTGCATGTCGGAGT +1     | Homozygous |
| T1 | <i>hd5-82.5</i>  | CTCCAAGGAGTCGAAGGAGACGGTGCAGGAGTGCATGTCGGAGT +1<br>CTCCAAGGAGTCGAAGGAGACGGTGCAGGAGTGCATGTCGGAGT +1     | Homozygous |

---

**Supplementary Table 8. List of oligos.** Table lists the oligo sequences used for designing the sgRNAs for the targeted genes and the primers used for detecting the T-DNA insertion and mutant genotypes. Blue nucleotides represent the BsaI restriction overhang.

| Name         | Sequence                             | Usage                                    |
|--------------|--------------------------------------|------------------------------------------|
| Hd2-sgRNA1-F | GGCA <sup>CGATGACTCCACCAGGCAGG</sup> | Design Hd2 sgRNA                         |
| Hd2-sgRNA1-R | AAAC <sup>CCTGCCTGGTGGAGTCATCG</sup> | Design Hd2 sgRNA                         |
| Hd4-sgRNA1-F | GGCA <sup>CGCCATCGCCACGATGATGA</sup> | Design Hd4 sgRNA                         |
| Hd4-sgRNA1-R | AAAC <sup>TCATCATCGTGGCGATGGCG</sup> | Design Hd4 sgRNA                         |
| Hd5-sgRNA1-F | GGCA <sup>GACGGTGCAGGAGTGCGTGT</sup> | Design Hd5 sgRNA                         |
| Hd5-sgRNA1-R | AAAC <sup>ACACGCACTCCTGCACCGTC</sup> | Design Hd5 sgRNA                         |
| Hd2-F1       | ATGATGGGAACCGCTCATCAC                | Amplify Hd2 target region                |
| Hd2-R6       | CATACATGCAGTGACGAAGC                 | Amplify Hd2 target region                |
| Hd4-F2       | ATGTCGATGGGACCAGCAGC                 | Amplify Hd4 target region                |
| Hd4-R3       | GATGGTGGCGCTGGCCGCGG                 | Amplify Hd4 target region                |
| Hd5-F2       | ACTTGCTGAGCCCGGTGGGC                 | Amplify Hd5 target region                |
| Hd5-R3       | GCGTGGTCATGGCCCAGAGG                 | Amplify Hd5 target region                |
| Cas9-F7      | GATCGACCTGTCTCAGCTGG                 | Amplify 240 bp of the T-DNA sequence     |
| Nos-R7       | CGGCAACAGGATTCAATCTTAAG              | Amplify 240 bp of the T-DNA sequence     |
| T7-F         | TAA TAC GAC TCA CTA TAG GG           | Sequence the cloned DNA into pjet vector |

**Supplementary File 1. Functional annotation of the predicted genes.** Gene annotation was performed according to the best match for each predicted protein against the NR NCBI protein database using Diamond Blastp. Columns A, C, and E list the number of genes involved in the three main Gene ontology (GO) terms (biological process (column B), molecular function (column D), and cellular component (column F) are listed for the five genome sequences (Cempo Ireng, Pulut Hitam-2, Balatinaw, Cempo Abang, and Zag). A separate spreadsheet was made for each variety.

**Supplementary File 2. Repetitive sequences in the genome of pigmented rice.** The Repetitive sequence distribution in the five sequenced genomes (Cempo Ireng, Pulut Hitam-2, Balatinaw, Cempo Abang, and Zag) are listed. Columns A and B show the ten main transposable elements classes and subclasses. Column C-E shows the number of the identified repetitive sequences, their size, and percentage in the genome. A separate spreadsheet was made for each variety.

**Supplementary File 3. Metabolic profiling of pigmented rice.** Columns A and B list the nine super-pathway and 59 sub-pathways, respectively. Column C lists the identified 625 biochemicals (575 known identity, 50 unknown). Column D-BN shows the average expression of the identified biochemical relative to the median value of these chemicals in all pigmented rice accessions.

**Supplementary File 4. Metal ion profiling of pigmented rice.** The file shows the quantitative measurement of 22 metal ions in 63 pigmented accessions (24 black, 35 red, and 4 brown). Columns A and B list the metal ion name and abbreviation, respectively. The measurements were calculated in the microgram scale relative to the 1 gram of grain weight as shown in column C. Column D-BN shows the metal content ( $\mu\text{g}$ ) in all pigmented rice accessions.

**Supplementary File 5. Correlation analysis between grain pigments and metal ion concentration.** The file shows the statistical correlation between the main grain pigments (anthocyanin and proanthocyanidins) and the 22 analyzed metal ion concentrations. Pearson's correlation coefficients (R) and P-values (P) were calculated. The correlation was considered to be significant at the 0.05 level.

## References

1. Martin, M. Cutadapt removes adapter sequences from high-throughput sequencing reads. *EMBnet J.* **17**, 3 (2011).
2. Bolger, A.M., Lohse, M. & Usadel, B. Trimmomatic: a flexible trimmer for Illumina sequence data. *Bioinformatics* **30**, 2114-2120 (2014).
3. Li, H. & Durbin, R. Fast and accurate long-read alignment with Burrows–Wheeler transform. *Bioinformatics* **26**, 589-595 (2010).
4. Danecek, P. et al. Twelve years of SAMtools and BCFtools. *GigaScience* **10** (2021).
5. McKenna, A. et al. The genome analysis toolkit: a MapReduce framework for analyzing next-generation DNA sequencing data. *Genome Res.* **20**, 1297-1303 (2010).
6. Van der Auwera, G.A. et al. From fastQ data to high-confidence variant calls: the genome analysis toolkit best practices pipeline. *Curr. Protoc. Bioinformatics* **43**, 11.10.11-11.10.33 (2013).
7. Wang, W. et al. Genomic variation in 3,010 diverse accessions of Asian cultivated rice. *Nature* **557**, 43-49 (2018).
8. Zhou, Y. et al. A platinum standard pan-genome resource that represents the population structure of Asian rice. *Scientific Data* **7**, 113 (2020).
9. Danecek, P. et al. The variant call format and VCFtools. *Bioinformatics (Oxford, England)* **27**, 2156-2158 (2011).
10. Purcell, S. et al. PLINK: a tool set for whole-genome association and population-based linkage analyses. *Am. J. Hum. Genet.* **81**, 559-575 (2007).
11. Hiei, Y. & Komari, T. Agrobacterium-mediated transformation of rice using immature embryos or calli induced from mature seed. *Nat. Protoc.* **3**, 824-834 (2008).
